# Supplementary material for: Dynamics of the gut microbiota in rats after hypobaric hypoxia exposure
Source: PeerJ journal article supplement (doi:10.7717/peerj.14090), 2022-10-07

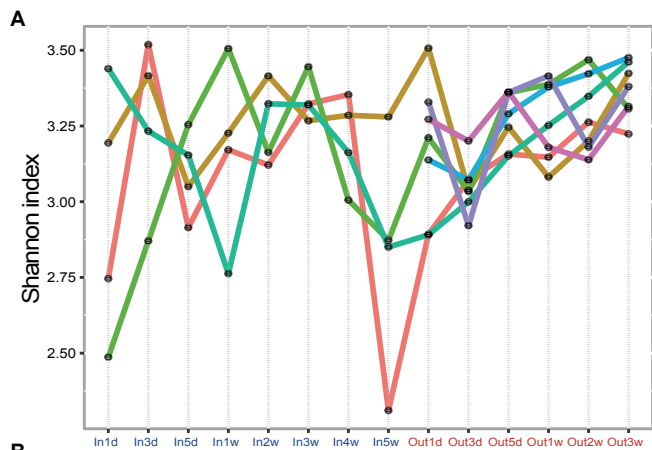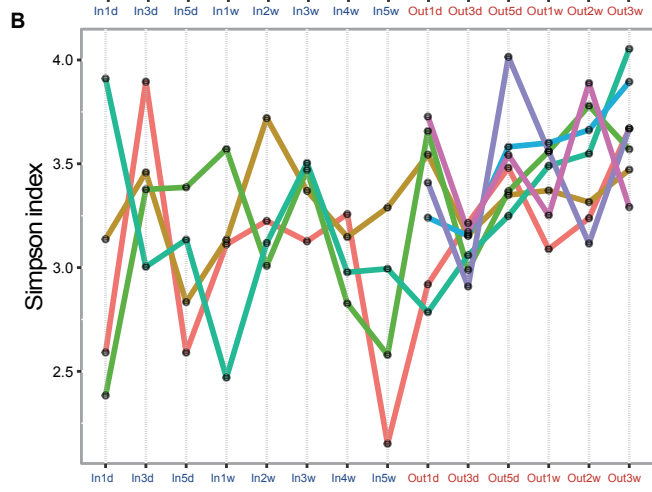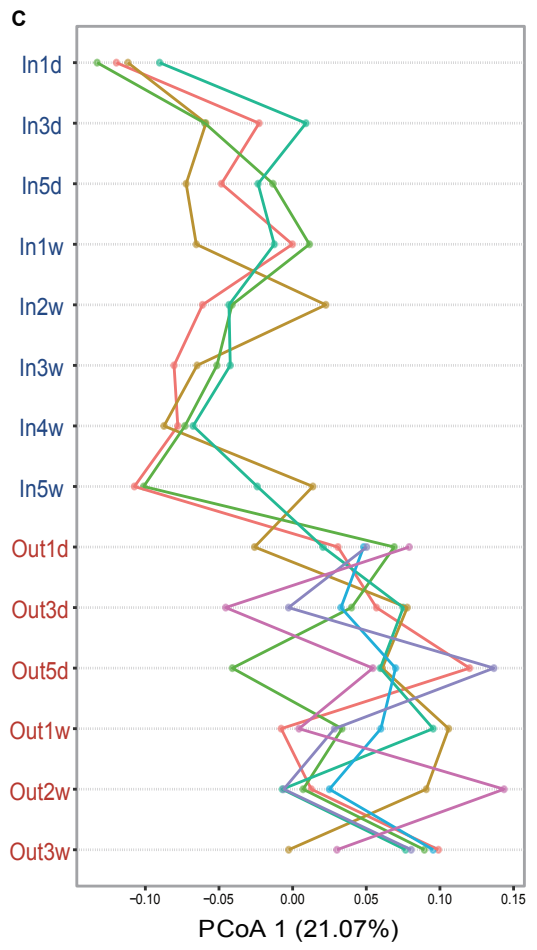

Supplement: Supplementary_figure_1.pdf [file Supplementary_figure_1.pdf]
