# Supplementary material for: Dynamics of the gut microbiota in rats after hypobaric hypoxia exposure
Source: PeerJ. 2022 Oct 7;10:e14090. doi: 10.7717/peerj.14090 (PMC9549897; doi:10.7717/peerj.14090)
Supplement: Table S1 [file peerj-10-14090-s004.xlsx]

## Sheet: diff_species
species	value	coef	stderr	N	N.not.0	pval	qval	mean_inside	mean_outside	ratio (outside/inside)	change
g__Prevotella;s__Prevotella loescheii	Outside	4.08e-05	4.01e-06	74	74	2.3e-22	8.46e-19	1.49e-05	5.56e-05	3.7376	up
g__Fibrobacter;s__Fibrobacter sp. UWT2	Outside	2.48e-05	2.5e-06	74	74	3.94e-21	7.25e-18	4.97e-06	2.97e-05	5.97397	up
g__Spongiibacterium;s__Spongiibacterium pacificum	Outside	2.98e-05	3.35e-06	74	70	1.08e-18	1.33e-15	6.83e-06	3.65e-05	5.3464	up
g__Parapedobacter;s__Parapedobacter koreensis	Outside	2.24e-05	2.36e-06	74	74	6.7e-18	6.17e-15	5.36e-06	2.77e-05	5.16569	up
g__Streptomyces;s__Streptomyces sp. AA4	Outside	2.42e-05	2.96e-06	74	74	2.83e-16	2.09e-13	8.23e-06	3.24e-05	3.93926	up
g__Bacteroides;s__Bacteroides propionicifaciens	Outside	2.06e-05	2.27e-06	74	74	1.89e-15	1.16e-12	7.62e-06	2.82e-05	3.70297	up
g__Bacteroides;s__Bacteroides sp. CAG:927	Outside	0.0260188	0.00255922	74	74	4.46e-15	2.35e-12	0.00966341	0.0362871	3.7551	up
g__Unclassified;s__Bacteroidia bacterium 43-41	Outside	5.63e-05	5.76e-06	74	74	8.02e-15	3.69e-12	2.4e-05	8.02e-05	3.33445	up
g__Porphyromonas;s__Porphyromonas endodontalis	Outside	2.16e-05	2.82e-06	74	74	1.93e-14	7.91e-12	6.53e-06	2.81e-05	4.30325	up
g__Millionella;s__Millionella massiliensis	Outside	3.14e-05	4.17e-06	74	74	2.66e-13	9.81e-11	2.69e-05	5.83e-05	2.16584	up
g__Odoribacter;s__Odoribacter sp. 43_10	Outside	4.27e-05	4.86e-06	74	74	5.27e-13	1.77e-10	1.78e-05	6.03e-05	3.3961	up
g__Parabacteroides;s__Parabacteroides sp. YL27	Outside	0.000198195	2.27e-05	74	74	7.07e-13	2.17e-10	0.000116505	0.00031433	2.698	up
g__Salinivirga;s__Salinivirga cyanobacteriivorans	Outside	1.93e-05	2.66e-06	74	74	7.86e-13	2.23e-10	1.03e-05	2.96e-05	2.85654	up
g__Prevotella;s__Prevotella sp. CAG:1031	Outside	0.00717084	0.000832191	74	74	1.08e-12	2.85e-10	0.00465357	0.0118743	2.55166	up
g__Dysgonomonas;s__Dysgonomonas sp. BGC7	Outside	5.22e-05	6.04e-06	74	74	1.91e-12	4.69e-10	2.49e-05	7.69e-05	3.08699	up
g__Unclassified;s__Bacteroidales bacterium 52_46	Outside	0.00990344	0.00117167	74	74	2.19e-12	5.05e-10	0.00732855	0.0173462	2.36694	up
g__Prevotella;s__Prevotella sp. CAG:873	Outside	0.0101581	0.00128734	74	74	2.45e-11	5.32e-09	0.00537183	0.0156289	2.90942	up
g__Bacteroides;s__Bacteroides sp. An19	Outside	-9.35e-05	1.18e-05	74	74	3.03e-11	6.21e-09	0.000165408	7.18e-05	0.433825	down
g__Dysgonomonas;s__Dysgonomonas gadei	Outside	3.89e-05	4.99e-06	74	74	3.59e-11	6.97e-09	1.44e-05	5.32e-05	3.69092	up
g__Bacteroides;s__Bacteroides ihuae	Outside	0.000108905	1.41e-05	74	74	5.06e-11	9.33e-09	7.67e-05	0.000185364	2.41764	up
g__Barnesiella;s__Barnesiella sp. An22	Outside	0.000234177	3.08e-05	74	74	8.82e-11	1.55e-08	0.000238658	0.000472438	1.97956	up
g__Parabacteroides;s__Parabacteroides timonensis	Outside	8.42e-05	1.11e-05	74	74	9.62e-11	1.61e-08	7.82e-05	0.000162349	2.07535	up
g__Unclassified;s__Bacteroidales bacterium 43_36	Outside	0.00391425	0.000518447	74	74	1.06e-10	1.7e-08	0.00243519	0.00636008	2.61174	up
g__Barnesiella;s__Barnesiella sp. An55	Outside	0.000219833	3.03e-05	74	74	3.72e-10	5.71e-08	0.000196904	0.000416375	2.11461	up
g__Prevotella;s__Prevotella sp. AG:487_50_53	Outside	8.12e-05	1.13e-05	74	74	5.4e-10	7.95e-08	8.84e-05	0.00016943	1.91661	up
g__Bacteroides;s__Bacteroides sp. CAG:144	Outside	0.00011114	1.6e-05	74	74	1.31e-09	1.85e-07	0.000112439	0.000223375	1.98663	up
g__Unclassified;s__Candidatus Saccharibacteria bacterium 32-50-10	Outside	1.74e-05	2.9e-06	74	67	1.74e-09	2.37e-07	4.34e-06	2.17e-05	5.01247	up
g__Butyricimonas;s__Butyricimonas sp. Marseille-P2440	Outside	0.000225512	3.31e-05	74	74	2.4e-09	3.05e-07	0.000165683	0.000390837	2.35894	up
g__Prevotella;s__Prevotella sp. oral taxon 472	Outside	1.46e-05	2.28e-06	74	74	2.38e-09	3.05e-07	8.03e-06	2.26e-05	2.81804	up
g__Alistipes;s__Alistipes sp. CAG:831	Outside	6.4e-05	9.46e-06	74	74	2.96e-09	3.52e-07	8.07e-05	0.000144569	1.79252	up
g__Unclassified;s__Candidatus Saccharibacteria bacterium GW2011_GWC2_48_9	Outside	1.83e-05	3.08e-06	74	70	2.94e-09	3.52e-07	4.48e-06	2.27e-05	5.07779	up
g__Clostridium;s__Clostridium nexile CAG:348	Outside	1.5e-05	2.48e-06	74	74	3.21e-09	3.7e-07	1.35e-05	2.84e-05	2.11224	up
g__Bacteroides;s__Bacteroides massiliensis	Outside	-0.000621577	9.24e-05	74	74	4.15e-09	4.64e-07	0.00100678	0.000371498	0.368995	down
g__Parabacteroides;s__Parabacteroides sp. An277	Outside	9.91e-05	1.49e-05	74	74	4.44e-09	4.82e-07	0.000103759	0.000202685	1.95343	up
g__Campylobacter;s__Campylobacter sp. FOBRC14	Outside	1.52e-05	2.3e-06	74	70	4.66e-09	4.9e-07	4.69e-06	1.94e-05	4.13478	up
g__Rhizobium;s__Rhizobium sp. NT-26	Outside	1.52e-05	2.56e-06	74	74	5.15e-09	5.27e-07	9.82e-06	2.49e-05	2.54126	up
g__Prolixibacter;s__Prolixibacter bellariivorans	Outside	1.52e-05	2.04e-06	74	74	6.05e-09	6.03e-07	5.44e-06	2.06e-05	3.78349	up
g__Unclassified;s__Candidatus Saccharibacteria bacterium 49-20	Outside	1.77e-05	3.06e-06	74	72	7.05e-09	6.84e-07	4.98e-06	2.27e-05	4.55584	up
g__Anaerophaga;s__Anaerophaga thermohalophila	Outside	2.19e-05	3.78e-06	74	74	9.21e-09	8.49e-07	1.29e-05	3.48e-05	2.69591	up
g__Unclassified;s__Firmicutes bacterium CAG:882	Outside	0.000216447	3.31e-05	74	74	9.21e-09	8.49e-07	0.00040079	0.000626887	1.56413	up
g__Unclassified;s__Candidatus Saccharibacteria bacterium 32-50-13	Outside	2.44e-05	4.17e-06	74	70	9.68e-09	8.7e-07	6.22e-06	3.06e-05	4.9165	up
g__Unclassified;s__Bacteroidia bacterium 44-10	Outside	2.09e-05	3.62e-06	74	74	1.03e-08	9.08e-07	2.04e-05	4.13e-05	2.02105	up
g__Catenovulum;s__Catenovulum agarivorans	Outside	1.48e-05	2.04e-06	74	74	1.06e-08	9.11e-07	4.77e-06	1.96e-05	4.10025	up
g__Unclassified;s__Bdellovibrio phage phi1402	Outside	-1.71e-05	3e-06	74	71	1.21e-08	1.01e-06	2.02e-05	3.14e-06	0.155799	down
g__Unclassified;s__uncultured murine large bowel bacterium BAC 54B	Outside	0.000100301	1.56e-05	74	74	1.29e-08	1.06e-06	9.66e-05	0.000196691	2.03677	up
g__Fibrobacter;s__Fibrobacter sp. UWB5	Outside	1.95e-05	3.43e-06	74	74	1.51e-08	1.21e-06	1.08e-05	3.03e-05	2.7986	up
g__Bacteroides;s__Bacteroides sp. CAG:1060_57_27	Outside	5.18e-05	8.26e-06	74	74	2.38e-08	1.87e-06	6.79e-05	0.000119597	1.76128	up
g__Prevotella;s__Prevotella sp. CAG:279	Outside	0.00134826	0.000215906	74	74	2.64e-08	2.03e-06	0.00190926	0.00325897	1.70693	up
g__Lactobacillus;s__Lactobacillus curvatus	Outside	-1.37e-05	2.38e-06	74	70	2.75e-08	2.07e-06	1.43e-05	6.58e-07	0.0458893	down
g__Bacteroides;s__Bacteroides sp. CAG:462	Outside	0.000185161	2.98e-05	74	74	2.93e-08	2.16e-06	0.000226201	0.000411058	1.81722	up
g__Tannerella;s__Tannerella forsythia	Outside	7.36e-05	1.18e-05	74	74	3.64e-08	2.63e-06	7.08e-05	0.000142735	2.01633	up
g__Porphyromonas;s__Porphyromonas gingivalis	Outside	4.91e-05	8.01e-06	74	74	4.21e-08	2.98e-06	5.73e-05	0.00010625	1.85586	up
g__Bacteroides;s__Bacteroides sp. CAG:189	Outside	2.68e-05	4.39e-06	74	74	4.38e-08	3.04e-06	2.58e-05	5.26e-05	2.03674	up
g__Bacteroides;s__Bacteroides sp. CAG:98	Outside	-0.00025908	4.21e-05	74	74	4.45e-08	3.04e-06	0.000429366	0.000164087	0.382161	down
g__Prevotella;s__Prevotella sp. khp1	Outside	4.27e-05	7.1e-06	74	74	6.74e-08	4.44e-06	3.81e-05	8.08e-05	2.11727	up
g__Unclassified;s__Candidatus Saccharibacteria bacterium RIFCSPHIGHO2_12_FULL_42_8	Outside	1.3e-05	2.25e-06	74	69	6.71e-08	4.44e-06	3.22e-06	1.62e-05	5.03469	up
g__Megasphaera;s__Megasphaera sp. An286	Outside	1.38e-05	2.54e-06	74	71	7.4e-08	4.78e-06	4.28e-06	1.81e-05	4.23002	up
g__Bacteroides;s__Bacteroides sp. 1_1_6	Outside	-1.7e-05	3.17e-06	74	74	8.08e-08	5.13e-06	2.42e-05	7.21e-06	0.297873	down
g__Alistipes;s__Alistipes sp. CAG:435	Outside	5.91e-05	9.96e-06	74	74	9.38e-08	5.86e-06	8.93e-05	0.000148336	1.66115	up
g__Halanaerobium;s__Halanaerobium congolense	Outside	-1.39e-05	2.6e-06	74	74	1.08e-07	6.51e-06	1.9e-05	5.17e-06	0.271667	down
g__Unclassified;s__Candidatus Saccharibacteria bacterium	Outside	3.81e-05	6.46e-06	74	74	1.07e-07	6.51e-06	1.37e-05	5.17e-05	3.7768	up
g__Unclassified;s__Candidatus Saccharibacteria bacterium 47-87	Outside	2.72e-05	4.63e-06	74	70	1.2e-07	7.12e-06	6.76e-06	3.39e-05	5.01817	up
g__Unclassified;s__Candidatus Saccharibacteria bacterium RAAC3_TM7_1	Outside	2.63e-05	4.49e-06	74	70	1.24e-07	7.26e-06	6.33e-06	3.26e-05	5.148	up
g__Unclassified;s__Candidatus Saccharibacteria oral taxon TM7x	Outside	2.79e-05	4.77e-06	74	70	1.42e-07	8.17e-06	7.55e-06	3.53e-05	4.68003	up
g__Fluviicola;s__Fluviicola sp.	Outside	1.26e-05	2.26e-06	74	74	1.74e-07	9.71e-06	9.89e-06	2.24e-05	2.26676	up
g__Prevotella;s__Prevotella sp. F0091	Outside	-4.39e-05	7.59e-06	74	74	1.74e-07	9.71e-06	7.24e-05	2.87e-05	0.39561	down
g__Bacteroides;s__Bacteroides sp. CAG:1060	Outside	6.19e-05	1.07e-05	74	74	1.82e-07	1e-05	6.14e-05	0.000123181	2.00639	up
g__Saccharicrinis;s__Saccharicrinis fermentans	Outside	1.35e-05	2.58e-06	74	74	1.93e-07	1.05e-05	7.05e-06	2.06e-05	2.9165	up
g__Thermophagus;s__Thermophagus xiamenensis	Outside	2.74e-05	4.78e-06	74	74	2.11e-07	1.13e-05	6.64e-06	3.4e-05	5.12348	up
g__Mucilaginibacter;s__Mucilaginibacter paludis	Outside	1.23e-05	2.15e-06	74	72	2.52e-07	1.33e-05	8.49e-06	2.08e-05	2.45096	up
g__Unclassified;s__Candidatus Saccharibacteria bacterium 32-49-12	Outside	2.45e-05	4.31e-06	74	72	2.57e-07	1.33e-05	6.33e-06	3.08e-05	4.86448	up
g__Capnocytophaga;s__Capnocytophaga canimorsus	Outside	1.31e-05	2.51e-06	74	74	2.61e-07	1.34e-05	4.36e-06	1.75e-05	4.003	up
g__Candidatus Saccharimonas;s__Candidatus Saccharimonas aalborgensis	Outside	2.94e-05	5.19e-06	74	74	2.86e-07	1.45e-05	1.59e-05	4.52e-05	2.83855	up
g__Barnesiella;s__Barnesiella viscericola	Outside	0.00020085	3.57e-05	74	74	3.24e-07	1.6e-05	0.000230784	0.000431321	1.86894	up
g__Porphyromonas;s__Porphyromonas gulae	Outside	2.94e-05	5.23e-06	74	74	3.26e-07	1.6e-05	2.93e-05	5.86e-05	2.00375	up
g__Sphingobacterium;s__Sphingobacterium deserti	Outside	1.29e-05	2.49e-06	74	74	3.47e-07	1.68e-05	9.55e-06	2.24e-05	2.34549	up
g__Bacteroides;s__Bacteroides sp. 3_1_33FAA	Outside	-0.000124224	2.21e-05	74	74	3.53e-07	1.69e-05	0.000208623	8.48e-05	0.406546	down
g__Parabacteroides;s__Parabacteroides sp. Marseille-P3160	Outside	1.58e-05	3.11e-06	74	74	3.96e-07	1.87e-05	1.94e-05	3.51e-05	1.81481	up
g__Lactobacillus;s__Lactobacillus equi	Outside	-5.01e-05	8.99e-06	74	74	4.18e-07	1.95e-05	5.22e-05	2.27e-06	0.0434548	down
g__Archangium;s__Archangium gephyra	Outside	1.22e-05	2.33e-06	74	70	4.64e-07	2.14e-05	2.8e-06	1.5e-05	5.36285	up
g__Desulfotomaculum;s__Desulfotomaculum copahuensis	Outside	1.22e-05	2.34e-06	74	74	4.94e-07	2.25e-05	4.76e-06	1.69e-05	3.55677	up
g__Lactobacillus;s__Lactobacillus ruminis	Outside	-7.22e-05	1.34e-05	74	74	9.76e-07	4.38e-05	0.000158889	8.85e-05	0.556844	down
g__Chryseobacterium;s__Chryseobacterium sp. 39-10	Outside	1.99e-05	3.99e-06	74	72	1.02e-06	4.54e-05	5.09e-06	2.53e-05	4.96154	up
g__Gabonia;s__Gabonia massiliensis	Outside	2.33e-05	4.41e-06	74	74	1.32e-06	5.81e-05	2.44e-05	4.77e-05	1.95371	up
g__Bacteroides;s__Bacteroides sp. AR29	Outside	-2.5e-05	4.76e-06	74	74	1.48e-06	6.42e-05	5.39e-05	2.9e-05	0.538163	down
g__Parabacteroides;s__Parabacteroides merdae CAG:48	Outside	-2.89e-05	5.5e-06	74	74	1.63e-06	6.99e-05	3.88e-05	9.83e-06	0.253353	down
g__Unclassified;s__uncultured bacterium Rlip1	Outside	1.26e-05	2.62e-06	74	74	1.75e-06	7.39e-05	1.5e-05	2.76e-05	1.83612	up
g__Unclassified;s__Candidatus Melainabacteria bacterium GWF2_37_15	Outside	-1.19e-05	2.44e-06	74	74	1.81e-06	7.59e-05	2.05e-05	8.63e-06	0.421857	down
g__Lactobacillus;s__Lactobacillus mali	Outside	-1.57e-05	3.3e-06	74	74	2.07e-06	8.58e-05	2e-05	4.3e-06	0.215284	down
g__Unclassified;s__Lachnospiraceae bacterium 3_1_46FAA	Outside	-0.000185383	3.6e-05	74	74	2.16e-06	8.84e-05	0.000226064	4.12e-05	0.182052	down
g__Spirosoma;s__Spirosoma endophyticum	Outside	1.12e-05	2.06e-06	74	70	2.53e-06	0.00010229	6.87e-06	1.8e-05	2.62661	up
g__Parabacteroides;s__Parabacteroides chinchillae	Outside	0.000443507	8.74e-05	74	74	2.95e-06	0.000118035	0.000449042	0.000892018	1.98649	up
g__Olsenella;s__Olsenella sp. oral taxon 807	Outside	1.16e-05	2.44e-06	74	74	3.55e-06	0.00014083	1.48e-05	2.64e-05	1.77894	up
g__Paenibacillus;s__Paenibacillus graminis	Outside	1.13e-05	2.37e-06	74	74	3.71e-06	0.000145366	4.53e-06	1.58e-05	3.48287	up
g__Acinetobacter;s__Acinetobacter sp. CAG:196	Outside	-1.17e-05	2.5e-06	74	72	3.78e-06	0.000146623	1.45e-05	2.79e-06	0.193025	down
g__Paenibacillus;s__Paenibacillus sp. FSL H7-0326	Outside	1.59e-05	3.44e-06	74	74	4.18e-06	0.000160582	3.98e-06	1.98e-05	4.9773	up
g__Parabacteroides;s__Parabacteroides johnsonii	Outside	-0.000264337	5.3e-05	74	74	4.25e-06	0.000161396	0.00043727	0.000169235	0.387026	down
g__Anaerovibrio;s__Anaerovibrio sp. RM50	Outside	1.69e-05	3.69e-06	74	74	5.31e-06	0.000199607	1.01e-05	2.7e-05	2.67076	up
g__Porphyromonas;s__Porphyromonas uenonis	Outside	1.09e-05	2.01e-06	74	74	5.49e-06	0.000204354	5.56e-06	1.64e-05	2.94969	up
g__Azospirillum;s__Azospirillum sp. CAG:239	Outside	-0.000494933	0.000100851	74	74	5.55e-06	0.000204684	0.000548944	5.55e-05	0.101107	down
g__Veillonella;s__Veillonella atypica	Outside	1.24e-05	2.74e-06	74	72	5.94e-06	0.000216712	1.07e-06	1.35e-05	12.6208	up
g__Endomicrobium;s__Endomicrobium proavitum	Outside	-1.6e-05	3.54e-06	74	74	6.71e-06	0.000242307	2.38e-05	7.8e-06	0.328167	down
g__Unclassified;s__Porphyromonadaceae bacterium COT-184 OH4590	Outside	1.85e-05	4.1e-06	74	74	7.56e-06	0.000270608	1.52e-05	3.37e-05	2.21455	up
g__Acetobacter;s__Acetobacter sp. 46_36	Outside	-1.06e-05	2.29e-06	74	74	8.32e-06	0.000294831	1.61e-05	5.58e-06	0.345425	down
g__Bacteroides;s__Bacteroides vulgatus	Outside	-0.00134501	0.000282955	74	74	1.12e-05	0.000391732	0.00201785	0.000673054	0.333551	down
g__Bacteroides;s__Bacteroides sp. CAG:443	Outside	9.42e-05	2e-05	74	74	1.19e-05	0.000409023	0.000100898	0.000194915	1.9318	up
g__Chitinophaga;s__Chitinophaga niabensis	Outside	1.04e-05	2.07e-06	74	74	1.2e-05	0.000409023	3.1e-06	1.37e-05	4.42161	up
g__Elusimicrobium;s__Elusimicrobium minutum	Outside	-0.000689313	0.000145607	74	74	1.21e-05	0.000409023	0.000871277	0.000182201	0.209119	down
g__Elusimicrobium;s__Elusimicrobium sp. An273	Outside	-0.0006804	0.000143636	74	74	1.2e-05	0.000409023	0.000863652	0.000183714	0.212717	down
g__Bacteroides;s__Bacteroides reticulotermitis	Outside	6.29e-05	1.35e-05	74	74	1.32e-05	0.000441811	0.000110879	0.000173727	1.56682	up
g__Butyricimonas;s__Butyricimonas virosa	Outside	-0.000623323	0.000132593	74	74	1.35e-05	0.000449144	0.000972609	0.000350222	0.360086	down
g__Eggerthella;s__Eggerthella sp. CAG:298	Outside	3.98e-05	8.74e-06	74	74	2.13e-05	0.000700904	3.98e-05	7.95e-05	1.99694	up
g__Formosa;s__Formosa sp. Hel1_33_131	Outside	9.86e-06	2.19e-06	74	73	2.19e-05	0.000714995	8.45e-06	1.83e-05	2.16499	up
g__Parafilimonas;s__Parafilimonas terrae	Outside	-2.02e-05	4.48e-06	74	74	2.59e-05	0.00083672	2.27e-05	2.57e-06	0.113417	down
g__Prochlorococcus;s__Prochlorococcus marinus	Outside	1.01e-05	2.35e-06	74	74	2.71e-05	0.000867981	4.61e-06	1.47e-05	3.18286	up
g__Prevotella;s__Prevotella sp. HMSC073D09	Outside	2e-05	4.48e-06	74	74	2.96e-05	0.000940196	1.64e-05	3.63e-05	2.21406	up
g__Unclassified;s__Bacteroidetes bacterium CG_4_9_14_3_um_filter_41_19	Outside	1.07e-05	1.83e-06	74	74	3.1e-05	0.000976093	2.26e-06	1.3e-05	5.7385	up
g__Muribaculum;s__Muribaculum intestinale	Outside	6.32e-05	1.43e-05	74	74	3.43e-05	0.0010705	0.000105649	0.000168712	1.59691	up
g__Flavobacterium;s__Flavobacterium psychrophilum	Outside	9.53e-06	2.16e-06	74	74	3.66e-05	0.00113085	1.01e-05	1.96e-05	1.94073	up
g__Mycoplasma;s__Mycoplasma sp. CAG:472	Outside	0.000115021	2.61e-05	74	74	3.69e-05	0.00113085	8.75e-05	0.000199424	2.28002	up
g__Unclassified;s__uncultured bacterium BAC10G6	Outside	9.25e-05	2.1e-05	74	74	3.71e-05	0.00113085	0.000155091	0.000247515	1.59593	up
g__Unclassified;s__Pseudomonadales bacterium GWC1_66_9	Outside	9.82e-06	2.32e-06	74	72	3.78e-05	0.00114254	5.33e-06	1.51e-05	2.83804	up
g__Unclassified;s__Sphingobacteriales bacterium UTBCD1	Outside	9.87e-06	1.91e-06	74	73	4.01e-05	0.00120253	2.55e-06	1.24e-05	4.86305	up
g__Bacteroides;s__Bacteroides sp. 14(A)	Outside	4.08e-05	9.36e-06	74	74	4.2e-05	0.00124096	7.78e-05	0.000118613	1.52464	up
g__Veillonella;s__Veillonella sp. CAG:933	Outside	-0.000300965	6.9e-05	74	74	4.21e-05	0.00124096	0.000364272	6.45e-05	0.177046	down
g__Oxalobacter;s__Oxalobacter formigenes	Outside	-1.05e-05	2.53e-06	74	74	4.27e-05	0.00124795	2.15e-05	1.08e-05	0.50521	down
g__Bacteroides;s__Bacteroides sp. 2_1_56FAA	Outside	-1.03e-05	2.5e-06	74	74	4.5e-05	0.00130588	1.75e-05	7.24e-06	0.414015	down
g__Bacteroides;s__Bacteroides sp. 3_1_40A	Outside	-3.22e-05	7.39e-06	74	74	4.54e-05	0.00130588	7.83e-05	4.54e-05	0.579942	down
g__Pseudobutyrivibrio;s__Pseudobutyrivibrio sp. C4	Outside	1.28e-05	3.13e-06	74	74	4.69e-05	0.00133866	1.44e-05	2.71e-05	1.88618	up
g__Eggerthella;s__Eggerthella sp. CAG:1427	Outside	1.6e-05	3.93e-06	74	74	5.15e-05	0.00146023	4.07e-05	5.66e-05	1.39358	up
g__Clostridium;s__Clostridium sp. CAG:590	Outside	-0.0023934	0.000556088	74	74	5.2e-05	0.00146355	0.00275817	0.000361053	0.130903	down
g__Azospirillum;s__Azospirillum sp. CAG:260	Outside	-1.04e-05	1.8e-06	74	74	5.29e-05	0.00147685	1.21e-05	1.75e-06	0.143965	down
g__Butyricimonas;s__Butyricimonas sp. Marseille-P3923	Outside	7.36e-05	1.72e-05	74	74	5.7e-05	0.00157819	0.000154941	0.000228498	1.47475	up
g__Desulfovibrio;s__Desulfovibrio sp. 6_1_46AFAA	Outside	-1.69e-05	4.16e-06	74	74	6.22e-05	0.00170057	2.14e-05	4.49e-06	0.210221	down
g__Paludibacter;s__Paludibacter jiangxiensis	Outside	2.49e-05	5.84e-06	74	74	6.23e-05	0.00170057	2.83e-05	5.31e-05	1.87669	up
g__Sphaerochaeta;s__Sphaerochaeta pleomorpha	Outside	-1e-05	2.48e-06	74	74	6.72e-05	0.00182013	2.05e-05	1.05e-05	0.513892	down
g__Chlamydia;s__Chlamydia trachomatis	Outside	-0.00291278	0.000689164	74	74	6.86e-05	0.00184545	0.00388588	0.000968332	0.249193	down
g__Pedobacter;s__Pedobacter xixiisoli	Outside	1.27e-05	1.43e-06	74	72	7.44e-05	0.00198719	1.01e-06	1.37e-05	13.4861	up
g__Azospirillum;s__Azospirillum sp. 51_20	Outside	-5.99e-05	1.43e-05	74	74	7.76e-05	0.00205845	9.43e-05	3.46e-05	0.367402	down
g__Bacteroides;s__Bacteroides sp. D2	Outside	0.000108321	2.61e-05	74	74	8.76e-05	0.00230572	9.19e-05	0.000200062	2.1762	up
g__Unclassified;s__Bacteroidetes oral taxon 274	Outside	1.17e-05	1.62e-06	74	74	8.83e-05	0.00230669	6.8e-06	1.84e-05	2.70976	up
g__Unclassified;s__Bacteroidales bacterium 45-6	Outside	2.18e-05	5.27e-06	74	74	9.43e-05	0.00244799	4.37e-05	6.55e-05	1.49771	up
g__Bacteroides;s__Bacteroides dorei	Outside	-0.000692954	0.000167777	74	74	9.93e-05	0.00254156	0.00130058	0.000588499	0.452489	down
g__Synechococcus;s__Synechococcus sp. WH 5701	Outside	1.16e-05	1.34e-06	74	74	9.9e-05	0.00254156	3.56e-06	1.52e-05	4.26526	up
g__Unclassified;s__Clostridium phage phi8074-B1	Outside	-8.78e-05	2.13e-05	74	69	0.000100166	0.00254559	9.07e-05	3.15e-06	0.0347692	down
g__Niastella;s__Niastella vici	Outside	1.1e-05	2.83e-06	74	74	0.00010366	0.00261635	8.84e-06	1.98e-05	2.24006	up
g__Parabacteroides;s__Parabacteroides sp. 20_3	Outside	-2.38e-05	5.8e-06	74	74	0.000110258	0.00275695	3.5e-05	1.13e-05	0.322482	down
g__Subdoligranulum;s__Subdoligranulum sp. 4_3_54A2FAA	Outside	-3.99e-05	9.71e-06	74	74	0.000110727	0.00275695	0.000104035	6.33e-05	0.608841	down
g__Flavobacterium;s__Flavobacterium sp. MEB061	Outside	9.79e-06	1.78e-06	74	74	0.000116457	0.00287025	6.86e-06	1.66e-05	2.42476	up
g__Lactobacillus;s__Lactobacillus hordei	Outside	8.75e-06	2.05e-06	74	74	0.000116835	0.00287025	4.16e-06	1.29e-05	3.09618	up
g__Allochromatium;s__Allochromatium vinosum	Outside	1.04e-05	1.2e-06	74	68	0.000118602	0.00288958	1.41e-06	1.17e-05	8.31875	up
g__Bacteroides;s__Bacteroides sp. CAG:702	Outside	2.87e-05	7.06e-06	74	74	0.000119613	0.00288958	7.07e-05	9.94e-05	1.40535	up
g__Unclassified;s__Porphyromonadaceae bacterium FC4	Outside	1.03e-05	1.79e-06	74	74	0.000119974	0.00288958	4.72e-06	1.51e-05	3.19547	up
g__Clostridium;s__Clostridium ventriculi	Outside	9.87e-06	2.55e-06	74	74	0.000125559	0.00300444	1.08e-05	2.1e-05	1.9375	up
g__Porphyromonas;s__Porphyromonas sp. COT-239 OH1446	Outside	1.2e-05	3.12e-06	74	74	0.000128349	0.0030514	1.56e-05	2.76e-05	1.76294	up
g__Pedobacter;s__Pedobacter sp. Hv1	Outside	1.05e-05	2.74e-06	74	74	0.000130456	0.00308161	1.08e-05	2.13e-05	1.97022	up
g__Rothia;s__Rothia nasimurium	Outside	1.47e-05	3.82e-06	74	73	0.000135025	0.00316921	4.95e-06	1.96e-05	3.95815	up
g__Cyanothece;s__Cyanothece sp. CCY0110	Outside	1.12e-05	1.35e-06	74	69	0.000141756	0.00330614	1.94e-06	1.29e-05	6.63043	up
g__Alistipes;s__Alistipes sp. CAG:53	Outside	-7.43e-05	1.84e-05	74	74	0.000142846	0.00331062	0.000114777	4.08e-05	0.355705	down
g__Prevotella;s__Prevotella sp. CAG:485	Outside	-0.00443404	0.0011071	74	74	0.000149144	0.00342836	0.0123072	0.00783436	0.636567	down
g__Prevotella;s__Prevotella sp. RM4	Outside	-2.05e-05	5.12e-06	74	74	0.000149787	0.00342836	4.31e-05	2.27e-05	0.526241	down
g__Thermobacillus;s__Thermobacillus composti	Outside	8.93e-06	1.96e-06	74	74	0.000151019	0.00343522	2.48e-06	1.13e-05	4.54121	up
g__Chitinophaga;s__Chitinophaga terrae Kim and Jung 2007	Outside	-9.11e-06	2.37e-06	74	71	0.000155821	0.00350121	9.66e-06	5.72e-07	0.0591916	down
g__Unclassified;s__Arc I group archaeon U1lsi0528_Bin055	Outside	-8.97e-06	1.86e-06	74	73	0.00015535	0.00350121	1.02e-05	1.31e-06	0.127557	down
g__Unclassified;s__Croceibacter phage P2559S	Outside	-0.000118004	2.96e-05	74	74	0.000160115	0.0035759	0.000122104	4.4e-06	0.0360495	down
g__Unclassified;s__Candidatus Melainabacteria bacterium GWA2_34_9	Outside	-8.93e-06	2.32e-06	74	74	0.000168496	0.00374041	1.26e-05	3.66e-06	0.291459	down
g__Fibrobacter;s__Fibrobacter sp. UWP2	Outside	1.06e-05	1.35e-06	74	73	0.000177695	0.003921	1.23e-06	1.18e-05	9.60476	up
g__Bacteroides;s__Bacteroides ovatus	Outside	0.000190828	4.81e-05	74	74	0.000181752	0.00398664	0.000393274	0.000583513	1.48373	up
g__Prevotella;s__Prevotella sp. S7 MS 2	Outside	-8.81e-06	2.3e-06	74	74	0.000196159	0.00427456	1.35e-05	4.69e-06	0.347845	down
g__Propionispira;s__Propionispira raffinosivorans	Outside	8.43e-06	2.11e-06	74	74	0.000197198	0.00427456	6.57e-06	1.5e-05	2.28045	up
g__Alistipes;s__Alistipes putredinis	Outside	-0.000118331	3.02e-05	74	74	0.000204262	0.00440178	0.000313167	0.000195406	0.623966	down
g__Chryseobacterium;s__Chryseobacterium zeae	Outside	1.05e-05	1.59e-06	74	74	0.000206769	0.00442991	1.2e-06	1.17e-05	9.72409	up
g__Unclassified;s__bacterium F082	Outside	1.14e-05	3.07e-06	74	74	0.000214805	0.00457547	2.43e-05	3.57e-05	1.46584	up
g__Bacteroides;s__Bacteroides timonensis	Outside	9.61e-05	2.47e-05	74	74	0.000226441	0.0047682	0.000216556	0.000312535	1.44321	up
g__Clostridium;s__Clostridium sp. SCN 57-10	Outside	-4.22e-05	1.09e-05	74	74	0.000226404	0.0047682	0.000108161	6.61e-05	0.610976	down
g__Alistipes;s__Alistipes obesi	Outside	-0.000290969	7.53e-05	74	74	0.000241005	0.00504605	0.00059202	0.00030197	0.510067	down
g__Alistipes;s__Alistipes sp. 56_sp_Nov_56_25	Outside	-7.16e-05	1.84e-05	74	74	0.000244616	0.00509271	0.000119047	4.78e-05	0.401117	down
g__Alloprevotella;s__Prevotella sp. oral taxon 473	Outside	3.09e-05	8.03e-06	74	74	0.000258133	0.00528456	4.81e-05	7.89e-05	1.64096	up
g__Bacteroides;s__Bacteroides sp. 3_1_23	Outside	-9.55e-06	1.69e-06	74	74	0.00025685	0.00528456	1.41e-05	4.56e-06	0.323836	down
g__Desulfosporosinus;s__Desulfosporosinus orientis	Outside	1.49e-05	3.85e-06	74	74	0.000256798	0.00528456	1.88e-05	3.36e-05	1.78227	up
g__Bacteroides;s__uncultured Bacteroides sp.	Outside	0.0001594	4.16e-05	74	74	0.000267119	0.00540843	0.00045634	0.000615644	1.34909	up
g__Clostridium;s__Clostridium sp. CAG:306	Outside	-0.0001452	3.79e-05	74	74	0.000265857	0.00540843	0.000196286	5.14e-05	0.261963	down
g__Parabacteroides;s__Parabacteroides merdae	Outside	-0.000357306	9.29e-05	74	74	0.000268743	0.00541157	0.0007362	0.000378489	0.514112	down
g__Unclassified;s__Proteobacteria bacterium CAG:495	Outside	-7.31e-05	1.92e-05	74	74	0.000287269	0.00575319	8.48e-05	1.19e-05	0.140514	down
g__Drancourtella;s__Drancourtella massiliensis	Outside	-8.26e-06	2.18e-06	74	74	0.000298369	0.00587962	1.88e-05	1.06e-05	0.561994	down
g__Lactobacillus;s__Lactobacillus frumenti	Outside	1.21e-05	3.35e-06	74	73	0.000297102	0.00587962	4.18e-06	1.63e-05	3.89801	up
g__Alistipes;s__Alistipes shahii	Outside	-0.000104203	2.75e-05	74	74	0.000307126	0.00601999	0.000199852	9.61e-05	0.480617	down
g__Collinsella;s__Collinsella aerofaciens	Outside	9.46e-06	2.58e-06	74	74	0.000315054	0.00614272	1.61e-05	2.56e-05	1.58377	up
g__Unclassified;s__Clostridiales bacterium SK-Y3	Outside	0.000128481	3.4e-05	74	74	0.000320067	0.00620761	8.91e-05	0.000217261	2.43961	up
g__Alistipes;s__Alistipes sp. An31A	Outside	8.75e-05	2.32e-05	74	74	0.000330158	0.00636981	0.000207154	0.000294587	1.42207	up
g__Dysgonomonas;s__Dysgonomonas mossii	Outside	9.11e-06	2.52e-06	74	74	0.000334336	0.00641682	1.03e-05	1.94e-05	1.87982	up
g__Prevotella;s__Prevotella sp. CAG:1124	Outside	-0.000310689	8.22e-05	74	74	0.000337406	0.00644218	0.000675069	0.000361987	0.536222	down
g__Mediterranea;s__Mediterranea sp. An20	Outside	6.49e-05	1.73e-05	74	74	0.000346433	0.00658045	0.000193387	0.000258229	1.33529	up
g__Clostridium;s__Clostridium sp. ATCC BAA-442	Outside	-2.46e-05	6.58e-06	74	74	0.00036138	0.00682915	8.3e-05	5.85e-05	0.704456	down
g__Bacillus;s__Bacillus sp. AFS006103	Outside	9.6e-06	2.69e-06	74	74	0.000373698	0.00699023	1.47e-05	2.43e-05	1.65137	up
g__Helicobacter;s__Helicobacter japonicus	Outside	0.00071016	0.000188339	74	74	0.000372875	0.00699023	0.000210552	0.000928733	4.41095	up
g__Bacteroides;s__Bacteroides intestinalis	Outside	-0.000243339	6.52e-05	74	74	0.000377766	0.00703065	0.000386625	0.000143933	0.37228	down
g__Lactococcus;s__Lactococcus lactis	Outside	4.33e-05	1.16e-05	74	74	0.000386458	0.00715627	3.08e-05	7.4e-05	2.4025	up
g__Bacillus;s__Bacillus megaterium	Outside	-8.92e-06	2.51e-06	74	74	0.000414527	0.00763766	2.36e-05	1.47e-05	0.622636	down
g__Geobacter;s__Geobacter uraniireducens	Outside	-8.8e-06	1.3e-06	74	72	0.000433314	0.0079441	1.05e-05	1.68e-06	0.160907	down
g__Bacteroides;s__Bacteroides sp. 41_26	Outside	-2.52e-05	6.82e-06	74	74	0.000438274	0.00799524	3.25e-05	7.07e-06	0.217361	down
g__Exiguobacterium;s__Exiguobacterium sp. AT1b	Outside	9.37e-06	1.54e-06	74	73	0.000471019	0.00855028	1.33e-06	1.07e-05	8.02004	up
g__Bacteroides;s__Bacteroides sartorii	Outside	0.000314113	8.58e-05	74	74	0.000475486	0.00858906	0.000839473	0.0011537	1.37432	up
g__Lactobacillus;s__Lactobacillus equicursoris	Outside	9.52e-06	2.73e-06	74	74	0.000483162	0.00868513	9.29e-06	1.88e-05	2.02299	up
g__Sporomusa;s__Sporomusa silvacetica	Outside	-8.2e-06	2.3e-06	74	74	0.000501911	0.00897837	1.33e-05	5.14e-06	0.385944	down
g__Prevotella;s__Prevotella nanceiensis	Outside	-1.15e-05	3.33e-06	74	74	0.000527587	0.00939207	2.29e-05	1.14e-05	0.496717	down
g__Prevotella;s__Prevotella aurantiaca	Outside	1.83e-05	5.03e-06	74	74	0.000538603	0.00954208	2.02e-05	3.83e-05	1.9022	up
g__Lascolabacillus;s__Lascolabacillus massiliensis	Outside	-7.82e-06	2.16e-06	74	74	0.000547799	0.00965856	1.3e-05	5.24e-06	0.401836	down
g__Ruminococcus;s__Ruminococcus sp. CAG:488	Outside	7.36e-05	2.03e-05	74	74	0.000551236	0.00967288	6.84e-05	0.000141755	2.07395	up
g__Mycoplasma;s__Mycoplasma sp. CAG:776	Outside	0.000638248	0.000176878	74	74	0.000565366	0.00987381	0.000684811	0.00132202	1.93048	up
g__Clostridium;s__Clostridium sp. CAG:226	Outside	-0.000349343	9.69e-05	74	74	0.000574555	0.00998696	0.000496726	0.000148214	0.298382	down
g__Methanomicrobium;s__Methanomicrobium mobile	Outside	7.65e-06	2e-06	74	74	0.000577896	0.00999787	7.68e-06	1.53e-05	1.99315	up
g__Unclassified;s__Porphyromonadaceae bacterium KH3CP3RA	Outside	9.01e-06	1.75e-06	74	74	0.000587247	0.0101122	5.89e-06	1.45e-05	2.45848	up
g__Unclassified;s__Bacteroidetes bacterium CG23_combo_of_CG06-09_8_20_14_all_32_9	Outside	5.6e-06	6.49e-07	74	68	0.000612416	0.0104965	9.7e-07	6.55e-06	6.75516	up
g__Odoribacter;s__Odoribacter laneus	Outside	1.2e-05	3.49e-06	74	74	0.000626979	0.0106964	2.45e-05	3.64e-05	1.48736	up
g__Unclassified;s__Firmicutes bacterium CAG:460	Outside	0.000119391	3.33e-05	74	74	0.00063305	0.0107009	0.000120194	0.00023853	1.98454	up
g__Unclassified;s__Firmicutes bacterium CAG:822	Outside	0.000242962	6.8e-05	74	74	0.000631997	0.0107009	0.000259834	0.000502351	1.93335	up
g__Alistipes;s__Alistipes sp. 56_11	Outside	-7.99e-06	2.27e-06	74	74	0.000653661	0.0109988	1.19e-05	3.93e-06	0.329914	down
g__Clostridium;s__Clostridium sp. CAG:1193	Outside	7.58e-05	2.13e-05	74	74	0.000662299	0.0110935	7.49e-05	0.000150521	2.01049	up
g__Faecalibacterium;s__Faecalibacterium sp. An58	Outside	-1.43e-05	4.17e-06	74	74	0.000676021	0.0112721	4.23e-05	2.81e-05	0.664045	down
g__Unclassified;s__Sphingobacteriales bacterium 40-81	Outside	1.03e-05	3.02e-06	74	73	0.00067933	0.0112763	9.19e-06	1.94e-05	2.11492	up
g__Enterococcus;s__Enterococcus cecorum	Outside	1.03e-05	3.02e-06	74	74	0.000689508	0.0113939	1.52e-05	2.55e-05	1.67284	up
g__Bacteroides;s__Bacteroides caccae	Outside	-0.000286318	8.07e-05	74	74	0.000717821	0.011801	0.000459544	0.000172783	0.375987	down
g__Roseburia;s__Roseburia sp. CAG:50	Outside	7.62e-06	2.15e-06	74	74	0.000720549	0.011801	7.79e-06	1.54e-05	1.97608	up
g__Desulfitibacter;s__Desulfitibacter sp. BRH_c19	Outside	7.5e-06	1.94e-06	74	74	0.000734598	0.0119778	7.05e-06	1.45e-05	2.06167	up
g__Candidatus Frackibacter;s__Candidatus Frackibacter sp. T328-2	Outside	-8.02e-06	2.33e-06	74	74	0.000741077	0.0120303	9.07e-06	1.08e-06	0.119067	down
g__Sutterella;s__Sutterella sp. KLE1602	Outside	-1.43e-05	4.19e-06	74	74	0.00074533	0.0120462	1.91e-05	4.8e-06	0.251531	down
g__Desulfovibrio;s__Desulfovibrio fairfieldensis	Outside	-1.43e-05	4.2e-06	74	74	0.000768815	0.0123715	2.45e-05	1.02e-05	0.415744	down
g__Eubacterium;s__Eubacterium sp. CAG:252	Outside	2.01e-05	5.71e-06	74	74	0.000773878	0.0123989	5.85e-05	7.86e-05	1.34172	up
g__Unclassified;s__Candidatus Gastranaerophilales bacterium HUM_21	Outside	-3.01e-05	8.58e-06	74	74	0.000780222	0.0124464	4.36e-05	1.35e-05	0.31073	down
g__Candidatus Magnetoglobus;s__Candidatus Magnetoglobus multicellularis	Outside	8.4e-06	2.47e-06	74	74	0.00078518	0.0124715	2.15e-06	1.04e-05	4.82261	up
g__Bacteroides;s__Bacteroides salyersiae	Outside	-0.000196916	5.62e-05	74	74	0.000790423	0.0125009	0.00032929	0.000132827	0.403373	down
g__Lactococcus;s__Lactococcus sp. Rs-Y01	Outside	2.03e-05	5.81e-06	74	73	0.000795157	0.012522	5.12e-06	2.54e-05	4.96746	up
g__Prevotella;s__Prevotella sp. MSX73	Outside	2.21e-05	6.31e-06	74	74	0.000804327	0.0126125	3.13e-05	5.33e-05	1.7042	up
g__Butyrivibrio;s__Butyrivibrio sp. VCD2006	Outside	3.5e-05	1e-05	74	74	0.000807899	0.0126149	4.18e-05	7.68e-05	1.83615	up
g__Unclassified;s__Bacteriodetes bacterium 13_1_20CM_4_60_6	Outside	-2.03e-05	5.79e-06	74	74	0.000820407	0.0127561	4.02e-05	1.99e-05	0.4957	down
g__Unclassified;s__uncultured bacterium IN-02	Outside	-1.18e-05	3.52e-06	74	74	0.00082931	0.0127866	1.58e-05	4.03e-06	0.255441	down
g__Unclassified;s__uncultured crAssphage	Outside	-0.000208867	5.97e-05	74	74	0.000826193	0.0127866	0.000260989	5.21e-05	0.199765	down
g__Propionispira;s__Propionispira arboris	Outside	1.09e-05	3.25e-06	74	74	0.000832831	0.0127874	1.76e-05	2.78e-05	1.57384	up
g__Unclassified;s__Candidatus Saccharibacteria bacterium RIFCSPHIGHO2_02_FULL_47_12	Outside	6.32e-06	1.03e-06	74	74	0.000837928	0.0128123	2.44e-06	8.75e-06	3.58544	up
g__Faecalibacterium;s__Faecalibacterium sp. An77	Outside	9.93e-06	2.98e-06	74	74	0.00087177	0.0132747	2.56e-05	3.55e-05	1.38724	up
g__Enterococcus;s__Enterococcus sp. 3H8_DIV0648	Outside	9.24e-06	2.78e-06	74	74	0.000879391	0.0133356	9.58e-06	1.88e-05	1.9628	up
g__Bacteroides;s__Bacteroides sp. An279	Outside	3.88e-05	1.12e-05	74	74	0.000900364	0.0135977	7.94e-05	0.000118114	1.48852	up
g__Unclassified;s__Erysipelotrichaceae bacterium MTC7	Outside	5.42e-06	8.31e-07	74	74	0.000908831	0.0136696	4.19e-06	9.6e-06	2.29175	up
g__Cryptobacterium;s__Cryptobacterium sp. CAG:338	Outside	8.12e-06	1.78e-06	74	74	0.000927328	0.0138911	7.72e-06	1.55e-05	2.00973	up
g__Ruminobacter;s__Ruminobacter sp. RM87	Outside	-7.94e-06	1.36e-06	74	74	0.000935212	0.0139524	1.41e-05	6.15e-06	0.437575	down
g__Butyrivibrio;s__Butyrivibrio sp. MB2005	Outside	1.37e-05	4.09e-06	74	74	0.000958644	0.0142444	1.91e-05	3.29e-05	1.72228	up
g__Marinilabilia;s__Marinilabilia salmonicolor	Outside	1e-05	3.04e-06	74	74	0.000972698	0.0143952	1.19e-05	2.2e-05	1.83919	up
g__Prevotella;s__Prevotella sp. 10(H)	Outside	8.01e-06	2.41e-06	74	74	0.000994956	0.0146657	1.37e-05	2.17e-05	1.58224	up
g__Bacteroides;s__Bacteroides nordii	Outside	-0.000179322	5.21e-05	74	74	0.0010008	0.0146931	0.000299811	0.000119362	0.398123	down
g__Bacteroides;s__Bacteroides sp. 2_1_16	Outside	-1.46e-05	4.25e-06	74	74	0.00101686	0.0148696	2.03e-05	5.84e-06	0.287299	down
g__Unclassified;s__Rickettsiaceae bacterium 4572_127	Outside	3.38e-05	9.87e-06	74	67	0.00103619	0.0150924	7.22e-06	4.09e-05	5.66755	up
g__Unclassified;s__Bacteroidales bacterium Barb7	Outside	3.51e-05	1.03e-05	74	74	0.00104037	0.0150935	6.16e-05	9.66e-05	1.56816	up
g__Bacillus;s__Bacillus sp. CAG:988	Outside	0.000105943	3.11e-05	74	74	0.00106856	0.0154417	0.000125361	0.000231083	1.84333	up
g__Clostridium;s__Clostridium tyrobutyricum	Outside	-7.73e-06	2.32e-06	74	74	0.00107377	0.0154565	2.3e-05	1.53e-05	0.664359	down
g__Brachyspira;s__Brachyspira hampsonii	Outside	-5.35e-06	8.67e-07	74	74	0.00108285	0.0154663	7.99e-06	2.66e-06	0.332659	down
g__Porphyromonas;s__Porphyromonas sp. KLE 1280	Outside	7.04e-06	1.23e-06	74	73	0.00107995	0.0154663	2.05e-06	9.08e-06	4.42071	up
g__Desulfovibrio;s__Desulfovibrio sp. A2	Outside	-1.14e-05	3.49e-06	74	74	0.0011513	0.0163804	1.57e-05	4.35e-06	0.277452	down
g__Ruminococcus;s__Ruminococcus sp. CAG:57	Outside	-1.34e-05	4.11e-06	74	74	0.00116104	0.0163924	1.98e-05	6.79e-06	0.343309	down
g__Unclassified;s__Lachnospiraceae bacterium AC2012	Outside	8.06e-06	2.46e-06	74	74	0.00116034	0.0163924	1.01e-05	1.81e-05	1.79814	up
g__Bacteroides;s__Bacteroides sp. 4_3_47FAA	Outside	-3.64e-05	1.08e-05	74	74	0.00118135	0.0165524	0.000107326	7.11e-05	0.662305	down
g__Leptotrichia;s__Leptotrichia goodfellowii	Outside	7.13e-06	2.01e-06	74	74	0.00117913	0.0165524	7.6e-06	1.47e-05	1.93556	up
g__Unclassified;s__Firmicutes bacterium CAG:65	Outside	-3.96e-05	1.17e-05	74	74	0.00122611	0.0170499	7.27e-05	3.76e-05	0.517318	down
g__Unclassified;s__Verrucomicrobia bacterium	Outside	7.11e-06	1.94e-06	74	68	0.00122283	0.0170499	6.56e-06	1.37e-05	2.08112	up
g__Bacteroides;s__Bacteroides sp. HMSC068A09	Outside	-8.95e-06	2.6e-06	74	74	0.00126139	0.0174718	2.15e-05	1.25e-05	0.583967	down
g__Coprobacter;s__Coprobacter secundus	Outside	-1.06e-05	3.29e-06	74	74	0.00126593	0.0174718	2.75e-05	1.69e-05	0.614205	down
g__Campylobacter;s__Campylobacter jejuni	Outside	-7.32e-06	1.87e-06	74	74	0.00129837	0.0177203	1.24e-05	5.05e-06	0.408778	down
g__Negativibacillus;s__Negativibacillus massiliensis	Outside	-1.11e-05	3.45e-06	74	74	0.00129756	0.0177203	2.81e-05	1.7e-05	0.605062	down
g__Treponema;s__Treponema sp. JC4	Outside	-4.88e-06	7.69e-07	74	74	0.00128926	0.0177203	7.21e-06	2.35e-06	0.325994	down
g__Megasphaera;s__Megasphaera sp. MJR8396C	Outside	7.07e-06	1.91e-06	74	74	0.00131139	0.0178321	8.4e-06	1.55e-05	1.84026	up
g__Clostridium;s__Clostridium tertium	Outside	-8.31e-06	2.58e-06	74	74	0.00132917	0.0180073	1.29e-05	4.58e-06	0.356032	down
g__Unclassified;s__Acidobacteriaceae bacterium KBS 96	Outside	-7.34e-06	2.21e-06	74	74	0.00134378	0.0181165	1.18e-05	4.48e-06	0.37903	down
g__Unclassified;s__Actinobacteria bacterium 66_15	Outside	7.16e-06	1.31e-06	74	74	0.00134706	0.0181165	4e-06	1.11e-05	2.7866	up
g__Paenibacillus;s__Paenibacillus antibioticophila	Outside	-7.45e-06	1.92e-06	74	74	0.00136245	0.0182568	1.06e-05	3.31e-06	0.311806	down
g__Mucispirillum;s__Mucispirillum schaedleri	Outside	-0.000235392	7.08e-05	74	72	0.00140098	0.0187052	0.000250357	1.55e-05	0.0620636	down
g__Prevotella;s__Prevotella sp. DNF00663	Outside	-1.92e-05	5.77e-06	74	74	0.00142413	0.0189456	4.51e-05	2.57e-05	0.569552	down
g__Fibrobacter;s__Fibrobacter sp. UWOV1	Outside	7.81e-06	1.5e-06	74	74	0.00144298	0.0190588	3.78e-06	1.15e-05	3.0523	up
g__Helcococcus;s__Helcococcus kunzii	Outside	7.41e-06	1.88e-06	74	74	0.00143867	0.0190588	7.63e-06	1.53e-05	2.01063	up
g__Unclassified;s__bacterium F083	Outside	4.02e-05	1.21e-05	74	74	0.00145144	0.019102	7.91e-05	0.000119129	1.507	up
g__Prevotella;s__Prevotella sp. CAG:487	Outside	7.37e-05	2.22e-05	74	74	0.00147541	0.0193483	0.000172648	0.000246324	1.42674	up
g__Unclassified;s__Bacteroidales bacterium WCE2008	Outside	2.71e-05	8.22e-06	74	74	0.00149839	0.01958	7.1e-05	9.81e-05	1.38134	up
g__Prevotella;s__Prevotella sp. khp7	Outside	-7.05e-06	1.84e-06	74	74	0.00151991	0.0197911	1.46e-05	7.56e-06	0.518392	down
g__Parabacteroides;s__Parabacteroides sp. D13	Outside	-4.77e-05	1.45e-05	74	74	0.00156931	0.0203624	0.000107048	5.97e-05	0.557528	down
g__Prevotella;s__Prevotella sp. lc2012	Outside	-1.64e-05	4.99e-06	74	74	0.00160835	0.0207956	3.98e-05	2.34e-05	0.589541	down
g__Brachyspira;s__Brachyspira pilosicoli	Outside	-7.33e-06	1.4e-06	74	74	0.00162098	0.0208858	1.02e-05	2.92e-06	0.285509	down
g__Enterococcus;s__Enterococcus termitis	Outside	7.03e-06	2.13e-06	74	74	0.00162786	0.0209012	6.54e-06	1.36e-05	2.07289	up
g__Coprococcus;s__Coprococcus eutactus CAG:665	Outside	1.11e-05	3.53e-06	74	74	0.00163581	0.0209304	1.59e-05	2.7e-05	1.70106	up
g__Paenibacillus;s__Paenibacillus apiarius	Outside	1.09e-05	3.48e-06	74	74	0.00166826	0.0212689	9.11e-06	2e-05	2.19867	up
g__Prevotella;s__Prevotella sp. CAG:5226	Outside	-0.000205338	6.29e-05	74	74	0.0016738	0.0212689	0.000520597	0.000315783	0.606579	down
g__Draconibacterium;s__Draconibacterium orientale	Outside	1.41e-05	4.33e-06	74	74	0.00171302	0.0216924	2.1e-05	3.51e-05	1.67185	up
g__Ruminiclostridium;s__Ruminiclostridium sp. KB18	Outside	-6.66e-06	1.26e-06	74	74	0.00174125	0.0219743	1.38e-05	7.2e-06	0.522128	down
g__Clostridium;s__Clostridium sp. CAG:433	Outside	0.000105682	3.25e-05	74	74	0.00176888	0.0222469	0.000137436	0.000242887	1.76728	up
g__Hymenobacter;s__Hymenobacter sp. APR13	Outside	4.58e-06	7.93e-07	74	74	0.00183379	0.0228294	3.78e-06	8.34e-06	2.21013	up
g__Methanobrevibacter;s__Methanobrevibacter curvatus	Outside	6.87e-06	2.08e-06	74	74	0.00183166	0.0228294	2.91e-06	9.77e-06	3.35436	up
g__Unclassified;s__Clostridiales bacterium GWD2_32_59	Outside	1.17e-05	3.74e-06	74	74	0.00182387	0.0228294	2.57e-05	3.74e-05	1.45365	up
g__Candidatus Methanoperedens;s__Candidatus Methanoperedens nitroreducens	Outside	6.86e-06	1.84e-06	74	68	0.0018571	0.0230418	2.6e-06	9.44e-06	3.63564	up
g__Unclassified;s__candidate division TM7 genomosp. GTL1	Outside	4.71e-06	8.42e-07	74	71	0.00186465	0.0230578	1.59e-06	6.29e-06	3.94859	up
g__Bacteroides;s__Bacteroides sp. 3_1_19	Outside	-3.78e-05	1.17e-05	74	74	0.00187646	0.0231262	4.38e-05	6.2e-06	0.141383	down
g__Bacteroides;s__Bacteroides vulgatus CAG:6	Outside	-7.31e-06	1.69e-06	74	74	0.00189022	0.0232182	8.43e-06	1.15e-06	0.13583	down
g__Unclassified;s__Bacteroidales bacterium Barb6XT	Outside	5.12e-06	9.23e-07	74	74	0.00191101	0.0233956	5.09e-06	1.02e-05	1.9993	up
g__Dehalobacter;s__Dehalobacter restrictus	Outside	-4.63e-06	8.31e-07	74	74	0.00194112	0.0236855	7.25e-06	2.63e-06	0.362936	down
g__Unclassified;s__Lachnospiraceae bacterium NE2001	Outside	1.93e-05	5.98e-06	74	74	0.00196441	0.0238906	4.15e-05	6.09e-05	1.46838	up
g__Coprococcus;s__Coprococcus sp. CAG:131_42_139	Outside	-1.2e-05	3.84e-06	74	74	0.00199278	0.0241559	2.33e-05	1.13e-05	0.484021	down
g__Prevotella;s__Prevotella sp. CAG:891	Outside	-0.00181224	0.000565538	74	74	0.00201757	0.0243762	0.00294026	0.00112656	0.383151	down
g__Prevotella;s__Prevotella sp. P2-180	Outside	-0.00342735	0.0010724	74	74	0.00207013	0.0247677	0.00548956	0.00203796	0.371243	down
g__Sutterella;s__Sutterella wadsworthensis	Outside	-2.12e-05	6.62e-06	74	74	0.0020639	0.0247677	4.49e-05	2.35e-05	0.523754	down
g__Unclassified;s__Coriobacteriaceae bacterium 68-1-3	Outside	8.44e-06	2.57e-06	74	74	0.00205857	0.0247677	9.96e-06	1.81e-05	1.81744	up
g__Mitsuokella;s__Mitsuokella jalaludinii	Outside	7.14e-06	1.46e-06	74	74	0.00211651	0.0252406	6.6e-06	1.37e-05	2.07878	up
g__Bacillus;s__Bacillus sp. MSP13	Outside	6.95e-06	1.72e-06	74	69	0.00219587	0.0261026	6.04e-07	7.54e-06	12.4728	up
g__Unclassified;s__Prevotellaceae bacterium Marseille-P2826	Outside	2.66e-05	8.39e-06	74	74	0.0022049	0.0261255	5.02e-05	7.68e-05	1.53005	up
g__Culturomica;s__Culturomica massiliensis	Outside	-6.53e-06	1.31e-06	74	73	0.00223931	0.0264483	8.01e-06	1.5e-06	0.187447	down
g__Porphyromonas;s__Porphyromonas cangingivalis	Outside	2.87e-05	9.05e-06	74	74	0.00225922	0.0265135	6.35e-05	9.21e-05	1.45092	up
g__Provencibacterium;s__Provencibacterium massiliense	Outside	-3.4e-05	1.07e-05	74	74	0.00225427	0.0265135	0.000128324	9.44e-05	0.735921	down
g__Gordonibacter;s__Gordonibacter massiliensis	Outside	2.62e-05	8.28e-06	74	74	0.00226979	0.026553	4.41e-05	7.03e-05	1.59339	up
g__Butyrivibrio;s__Butyrivibrio sp. NC3005	Outside	1.7e-05	5.36e-06	74	74	0.00228137	0.0265887	2.72e-05	4.41e-05	1.62318	up
g__Fontibacillus;s__Fontibacillus panacisegetis	Outside	-4.42e-06	7.57e-07	74	74	0.00228728	0.0265887	5.97e-06	1.56e-06	0.262148	down
g__Prevotella;s__Prevotella sp. CAG:1185	Outside	-0.000271863	8.58e-05	74	74	0.00232623	0.0269564	0.000787284	0.000515757	0.65511	down
g__Christensenella;s__Christensenella massiliensis	Outside	1.18e-05	3.84e-06	74	74	0.00236739	0.0273159	2.71e-05	3.95e-05	1.45828	up
g__Geosporobacter;s__Geosporobacter ferrireducens	Outside	6.95e-06	2.23e-06	74	74	0.00237207	0.0273159	1.58e-05	2.27e-05	1.43989	up
g__Clostridium;s__Clostridium haemolyticum	Outside	-4.49e-06	8.53e-07	74	74	0.00240543	0.0276138	5.22e-06	7.43e-07	0.142226	down
g__Paraclostridium;s__Paraclostridium bifermentans	Outside	-7.06e-06	2.28e-06	74	74	0.00242464	0.0277478	1.49e-05	7.84e-06	0.526751	down
g__Desulfovibrio;s__Desulfovibrio piger	Outside	-6.8e-05	2.16e-05	74	74	0.00244383	0.0278808	0.000103957	3.6e-05	0.34644	down
g__Bacteroides;s__Bacteroides luti	Outside	3.49e-05	1.11e-05	74	74	0.00246941	0.0279993	8.25e-05	0.000117375	1.4219	up
g__Lactobacillus;s__Lactobacillus satsumensis	Outside	-4.44e-06	8.44e-07	74	69	0.00246794	0.0279993	5.03e-06	6e-07	0.11937	down
g__Ruminococcus;s__Ruminococcus sp. CAG:563	Outside	5.6e-05	1.79e-05	74	74	0.00250713	0.0283398	6.54e-05	0.000121344	1.85483	up
g__Duodenibacillus;s__Duodenibacillus massiliensis	Outside	-6.57e-06	2.03e-06	74	74	0.00254533	0.0286836	1.15e-05	4.93e-06	0.429841	down
g__Niabella;s__Niabella aurantiaca	Outside	4.57e-06	8.39e-07	74	70	0.00256278	0.0287922	1.99e-06	6.66e-06	3.34063	up
g__Acholeplasma;s__Acholeplasma sp. CAG:878	Outside	0.000202995	6.5e-05	74	74	0.00257398	0.0288301	0.000170531	0.000373125	2.18802	up
g__Desulfovibrio;s__Desulfovibrio sp. FW1012B	Outside	-4.53e-06	8.65e-07	74	74	0.00258955	0.0289166	5.44e-06	9.23e-07	0.169713	down
g__Treponema;s__Treponema bryantii	Outside	5.12e-05	1.63e-05	74	74	0.00261064	0.0289765	8.88e-05	0.000140898	1.58714	up
g__Unclassified;s__Peptococcaceae bacterium CEB3	Outside	7.42e-06	2.45e-06	74	74	0.00260458	0.0289765	1.74e-05	2.48e-05	1.4247	up
g__Mycobacterium;s__Mycobacterium abscessus	Outside	6.99e-06	1.52e-06	74	74	0.0026227	0.029023	6.89e-06	1.38e-05	2.0038	up
g__Pseudoramibacter;s__Pseudoramibacter alactolyticus	Outside	6.58e-06	1.82e-06	74	74	0.00263957	0.0291222	1.27e-05	1.93e-05	1.51584	up
g__Prevotella;s__Prevotella sp. CAG:1058	Outside	-0.000230106	7.39e-05	74	74	0.00272387	0.0299625	0.000630448	0.000398369	0.631882	down
g__Flavobacterium;s__Flavobacterium sp. TH021	Outside	6.86e-06	1.46e-06	74	71	0.00275093	0.0300807	2.57e-06	9.3e-06	3.61713	up
g__Prevotella;s__Prevotella amnii	Outside	6.38e-05	2.06e-05	74	74	0.00274478	0.0300807	0.000124152	0.000187834	1.51293	up
g__Bacillus;s__Bacillus thuringiensis	Outside	-8.83e-06	2.96e-06	74	74	0.00280752	0.0306086	2.82e-05	1.93e-05	0.685003	down
g__Myroides;s__Myroides odoratus	Outside	3.89e-06	6.69e-07	74	73	0.00283356	0.0308014	1.86e-06	5.74e-06	3.09418	up
g__Mobilibacterium;s__Mobilibacterium timonense	Outside	-1.79e-05	5.81e-06	74	74	0.00285731	0.0309682	2.95e-05	1.16e-05	0.393707	down
g__Bacteroides;s__Bacteroides sp. CAG:875	Outside	1.88e-05	6.09e-06	74	74	0.0028687	0.0310004	4.96e-05	6.84e-05	1.37832	up
g__Holdemania;s__Holdemania massiliensis	Outside	9.98e-06	3.35e-06	74	74	0.00290361	0.031286	3.68e-05	4.67e-05	1.27118	up
g__Campylobacter;s__Campylobacter fetus	Outside	4.2e-05	1.35e-05	74	74	0.00291504	0.0313175	5.7e-05	9.95e-05	1.74574	up
g__Parabacteroides;s__Parabacteroides johnsonii CAG:246	Outside	-6.53e-06	1.38e-06	74	74	0.00295555	0.0315687	1.34e-05	7.14e-06	0.531526	down
g__Prevotella;s__Prevotella sp. HJM029	Outside	1.29e-05	4.2e-06	74	74	0.00295308	0.0315687	2.2e-05	3.49e-05	1.58751	up
g__Gracilibacter;s__Gracilibacter sp. BRH_c7a	Outside	6.74e-06	1.66e-06	74	74	0.00298519	0.0317931	1.06e-05	1.73e-05	1.63424	up
g__Clostridium;s__Clostridium cochlearium	Outside	6.92e-06	2.29e-06	74	74	0.00301008	0.0319658	1.19e-05	1.88e-05	1.58047	up
g__Bacteroides;s__Bacteroides sp. D22	Outside	-8.62e-06	2.91e-06	74	74	0.00303252	0.0321116	1.87e-05	1.01e-05	0.540105	down
g__Petrimonas;s__Petrimonas mucosa	Outside	6.39e-06	1.97e-06	74	74	0.00308371	0.0323746	1.13e-05	1.76e-05	1.5662	up
g__Sunxiuqinia;s__Sunxiuqinia elliptica	Outside	4.65e-06	9.63e-07	74	74	0.00306775	0.0323746	5.41e-06	1e-05	1.85661	up
g__Unclassified;s__Sphingobacteriales bacterium 50-39	Outside	-4.48e-06	8.92e-07	74	74	0.00307999	0.0323746	5.97e-06	1.47e-06	0.246372	down
g__Chitinophaga;s__[Flexibacter] sp. ATCC 35208	Outside	4.01e-06	7.72e-07	74	74	0.0031411	0.0328833	2.17e-06	6.18e-06	2.84591	up
g__Succinatimonas;s__Succinatimonas hippei	Outside	-4.33e-06	8.56e-07	74	74	0.00317386	0.0331323	7.76e-06	3.36e-06	0.433156	down
g__Alistipes;s__Alistipes sp. 58_9_plus	Outside	-0.000164977	5.42e-05	74	74	0.00323459	0.0336708	0.000297073	0.000132693	0.446668	down
g__Pseudobutyrivibrio;s__Pseudobutyrivibrio sp. UC1225	Outside	6.33e-06	1.95e-06	74	74	0.00329713	0.0342252	7.38e-06	1.37e-05	1.8563	up
g__Alistipes;s__Alistipes ihumii	Outside	2.45e-05	8.06e-06	74	74	0.00331298	0.0342931	6.9e-05	9.35e-05	1.35493	up
g__Unclassified;s__Candidatus Beckwithbacteria bacterium CG10_big_fil_rev_8_21_14_0_10_34_10	Outside	6.67e-06	1.59e-06	74	71	0.00333087	0.0343816	1.12e-06	7.78e-06	6.92635	up
g__Helicobacter;s__Helicobacter pylori	Outside	3.62e-06	5.84e-07	74	72	0.00345568	0.0354713	1.6e-06	5.22e-06	3.2522	up
g__Unclassified;s__uncultured bacterium pUR16A2	Outside	-8.34e-06	2.85e-06	74	74	0.00344963	0.0354713	1.44e-05	6.03e-06	0.419579	down
g__Avibacterium;s__Avibacterium paragallinarum	Outside	6.27e-06	1.89e-06	74	73	0.00353912	0.0362269	5.21e-06	1.15e-05	2.2024	up
g__Geobacillus;s__Geobacillus stearothermophilus	Outside	1.66e-05	5.49e-06	74	74	0.00354897	0.036227	2.14e-05	3.7e-05	1.73347	up
g__Endomicrobium;s__Candidatus Endomicrobium trichonymphae	Outside	-3.58e-06	5.79e-07	74	73	0.0036025	0.0366718	4.51e-06	9.37e-07	0.207918	down
g__Cloacibacterium;s__Cloacibacterium normanense	Outside	-3.65e-06	6.55e-07	74	71	0.0036136	0.0366835	4.18e-06	5.41e-07	0.129613	down
g__Clostridium;s__Clostridium sp. CAG:524	Outside	8.49e-05	2.82e-05	74	74	0.00362854	0.036734	6.12e-05	0.000145892	2.38488	up
g__Parabacteroides;s__Parabacteroides sp. HGS0025	Outside	2.78e-05	9.25e-06	74	74	0.00367308	0.037083	5.2e-05	7.98e-05	1.53396	up
g__Eubacterium;s__Eubacterium sp. CAG:192	Outside	0.000141199	4.7e-05	74	74	0.00372658	0.0375203	7.98e-05	0.000219895	2.75404	up
g__Bacillus;s__Bacillus horikoshii	Outside	-3.62e-06	6.61e-07	74	74	0.00373968	0.0375496	5.4e-06	1.79e-06	0.331289	down
g__Bacillus;s__Bacillus sp. FJAT-27986	Outside	-4.22e-06	8.79e-07	74	74	0.00378523	0.0379038	9.46e-06	5.26e-06	0.556346	down
g__Prevotella;s__Prevotella sp. CAG:386	Outside	-0.0012035	0.000401527	74	74	0.00381943	0.0381425	0.0019566	0.00075448	0.385607	down
g__Unclassified;s__Lachnospiraceae bacterium AC2014	Outside	6.61e-05	2.2e-05	74	74	0.00383056	0.0381503	1.89e-05	8.52e-05	4.51629	up
g__Rufibacter;s__Rufibacter sp. DG31D	Outside	3.52e-06	5.74e-07	74	71	0.00384312	0.0381723	8.96e-07	4.4e-06	4.91334	up
g__Slackia;s__Slackia piriformis	Outside	9.85e-06	3.4e-06	74	74	0.00386575	0.0382938	1.45e-05	2.42e-05	1.67306	up
g__Fusobacterium;s__Fusobacterium necrophorum	Outside	-6.34e-06	2.09e-06	74	74	0.00389728	0.0385026	1.77e-05	1.14e-05	0.643588	down
g__Faecalibacterium;s__Faecalibacterium prausnitzii	Outside	-0.000301345	0.000101074	74	74	0.0039121	0.0385457	0.00122345	0.000923028	0.754446	down
g__Dehalobacter;s__Dehalobacter sp. FTH1	Outside	-1.18e-05	4.07e-06	74	74	0.00393377	0.038556	4.2e-05	3.03e-05	0.720572	down
g__Desulfovibrio;s__uncultured Desulfovibrio sp.	Outside	-6.48e-06	1.89e-06	74	74	0.00393407	0.038556	8.96e-06	2.53e-06	0.282812	down
g__Alistipes;s__Alistipes finegoldii	Outside	-0.000112602	3.77e-05	74	74	0.00394682	0.0385783	0.000245696	0.000134168	0.546075	down
g__Sphingobacterium;s__Sphingobacterium sp. 21	Outside	3.85e-06	7.89e-07	74	68	0.00397495	0.0387505	3.43e-06	7.27e-06	2.12179	up
g__Paraprevotella;s__Paraprevotella clara	Outside	6.49e-05	2.18e-05	74	74	0.00403418	0.0392241	0.000160416	0.000225249	1.40416	up
g__Anaeromassilibacillus;s__Anaeromassilibacillus sp. An172	Outside	-0.000340187	0.000114804	74	74	0.00412424	0.0399943	0.000693208	0.000353902	0.510527	down
g__Flexibacter;s__Flexibacter flexilis	Outside	3.5e-06	5.88e-07	74	74	0.00417515	0.0403817	1.72e-06	5.21e-06	3.02714	up
g__Unclassified;s__Porphyromonadaceae bacterium NLAE-zl-C104	Outside	-3.6e-06	6.49e-07	74	70	0.00424583	0.0409578	4.14e-06	5.42e-07	0.130886	down
g__Prevotella;s__Prevotella sp. P5-64	Outside	-6.39e-05	2.16e-05	74	74	0.00428551	0.0411253	0.00016118	9.75e-05	0.604811	down
g__Unclassified;s__Bacteroidales bacterium 55_9	Outside	-0.000218957	7.42e-05	74	74	0.00428408	0.0411253	0.00042679	0.000208598	0.48876	down
g__Flavonifractor;s__Flavonifractor sp. An9	Outside	-1.92e-05	6.53e-06	74	74	0.00434016	0.0412204	6.23e-05	4.31e-05	0.692243	down
g__Prevotella;s__Prevotella sp. C561	Outside	1.37e-05	4.64e-06	74	74	0.00433746	0.0412204	3.38e-05	4.74e-05	1.40392	up
g__Pseudoscardovia;s__Pseudoscardovia radai	Outside	3.41e-06	5.24e-07	74	73	0.00432448	0.0412204	9.58e-07	4.36e-06	4.55552	up
g__Unclassified;s__Bacilli bacterium VT-13-104	Outside	3.62e-06	6.21e-07	74	71	0.0043324	0.0412204	1.47e-06	4.96e-06	3.37127	up
g__Peptoniphilus;s__Peptoniphilus sp. ING2-D1G	Outside	1.05e-05	3.69e-06	74	73	0.00438806	0.0415681	1.04e-05	2.09e-05	2.00983	up
g__Alkaliphilus;s__Alkaliphilus oremlandii	Outside	1.42e-05	4.82e-06	74	74	0.00442194	0.0417816	2.83e-05	4.24e-05	1.49974	up
g__Lactobacillus;s__Lactobacillus paracasei	Outside	-3.61e-06	7.31e-07	74	72	0.00447904	0.0422129	4.43e-06	8.35e-07	0.188434	down
g__Senegalimassilia;s__Senegalimassilia anaerobia	Outside	1.54e-05	5.24e-06	74	74	0.00456721	0.042859	2.29e-05	3.71e-05	1.62012	up
g__Slackia;s__Slackia heliotrinireducens	Outside	3.39e-05	1.16e-05	74	74	0.00457085	0.042859	5.59e-05	8.72e-05	1.5596	up
g__Eubacterium;s__Eubacterium sp. CAG:161	Outside	7.32e-05	2.5e-05	74	74	0.00462075	0.0432169	7.5e-05	0.00014668	1.95542	up
g__Lactococcus;s__Lactococcus piscium	Outside	6.07e-06	1.98e-06	74	69	0.00464322	0.0433172	2.9e-06	8.96e-06	3.0894	up
g__Unclassified;s__Erysipelotrichaceae bacterium 5_2_54FAA	Outside	-2.34e-05	8.01e-06	74	74	0.00466311	0.0433929	3.69e-05	1.37e-05	0.370042	down
g__Desulfovibrio;s__Desulfovibrio legallii	Outside	-2.44e-05	8.36e-06	74	74	0.00476066	0.044189	3.05e-05	6.27e-06	0.205438	down
g__Unclassified;s__Eggerthellaceae bacterium AT8	Outside	3.04e-05	1.04e-05	74	74	0.00477323	0.0441944	3.36e-05	6.18e-05	1.84199	up
g__Clostridium;s__Clostridium formicaceticum	Outside	6.02e-06	1.92e-06	74	74	0.00482681	0.0442823	1.15e-05	1.75e-05	1.52284	up
g__Parabacteroides;s__Parabacteroides sp. merdae-related_45_40	Outside	-1.86e-05	6.38e-06	74	74	0.0048308	0.0442823	3.85e-05	2e-05	0.519191	down
g__Unclassified;s__Candidatus Melainabacteria bacterium GWF2_32_7	Outside	-3.86e-06	8.52e-07	74	72	0.00483039	0.0442823	4.75e-06	8.93e-07	0.188006	down
g__Unclassified;s__Candidatus Peregrinibacteria bacterium GW2011_GWC2_33_13	Outside	-4.63e-06	1.07e-06	74	74	0.00480146	0.0442823	8.65e-06	4.03e-06	0.466422	down
g__Unclassified;s__Clostridiales bacterium VE202-08	Outside	6.35e-06	1.62e-06	74	74	0.00486356	0.0444364	7.38e-06	1.39e-05	1.87782	up
g__Unclassified;s__Elusimicrobia bacterium GWB2_63_22	Outside	-4.19e-06	9.4e-07	74	69	0.00487172	0.0444364	5.32e-06	1.15e-06	0.215219	down
g__Olsenella;s__Olsenella umbonata	Outside	6.19e-06	1.52e-06	74	74	0.00489549	0.0445429	7.28e-06	1.34e-05	1.84622	up
g__Bacteroides;s__Bacteroides fragilis	Outside	-0.0018488	0.00063549	74	74	0.00492745	0.0446134	0.00340482	0.00155121	0.455591	down
g__Tangfeifania;s__Tangfeifania diversioriginum	Outside	-5.17e-06	1.2e-06	74	72	0.0049207	0.0446134	7.48e-06	2.29e-06	0.306219	down
g__Aminomonas;s__Aminomonas paucivorans	Outside	-4.24e-06	9.6e-07	74	74	0.00494045	0.0446215	5.11e-06	8.83e-07	0.172716	down
g__Bacillus;s__Bacillus cytotoxicus	Outside	-5.72e-06	1.35e-06	74	72	0.00499609	0.0446343	7.97e-06	2.32e-06	0.290857	down
g__Ignavigranum;s__Ignavigranum ruoffiae	Outside	6.19e-06	1.59e-06	74	68	0.00500244	0.0446343	1.78e-06	7.96e-06	4.46937	up
g__Pedobacter;s__Pedobacter sp. Leaf216	Outside	3.61e-06	5.07e-07	74	67	0.00499402	0.0446343	8.66e-07	4.58e-06	5.28782	up
g__Streptococcus;s__Streptococcus agalactiae	Outside	7.46e-06	2.65e-06	74	74	0.00496988	0.0446343	1.77e-05	2.51e-05	1.42175	up
g__Unclassified;s__uncultured bacterium Lq_025_E06	Outside	-1.01e-05	3.59e-06	74	74	0.00499675	0.0446343	2.21e-05	1.2e-05	0.543822	down
g__Clostridium;s__Clostridium sp. CAG:413	Outside	0.000173284	6e-05	74	74	0.00512202	0.0454895	0.000227232	0.000400269	1.7615	up
g__Eubacterium;s__Eubacterium sp. 41_20	Outside	6.27e-06	2.17e-06	74	74	0.00512297	0.0454895	6.89e-06	1.31e-05	1.90847	up
g__Clostridium;s__Clostridium sp. CAG:793	Outside	0.000203297	7.02e-05	74	74	0.0051504	0.0455137	0.000304342	0.000507276	1.6668	up
g__Unclassified;s__Desulfovibrionaceae bacterium CG1_02_65_16	Outside	-4.32e-06	9.89e-07	74	74	0.00514495	0.0455137	5.47e-06	1.15e-06	0.210805	down
g__Azospirillum;s__Azospirillum sp. 47_25	Outside	-7.13e-06	2.54e-06	74	74	0.00517605	0.045631	1.32e-05	6.13e-06	0.463189	down
g__Bacteroides;s__Bacteroides cellulosilyticus	Outside	4.93e-05	1.71e-05	74	74	0.00523136	0.0460085	0.000178456	0.000227443	1.27451	up
g__Alistipes;s__Alistipes onderdonkii	Outside	-2.05e-05	7.12e-06	74	74	0.00528604	0.0461486	6.02e-05	3.98e-05	0.661364	down
g__Bacteroides;s__Bacteroides sp. 9_1_42FAA	Outside	4.62e-05	1.6e-05	74	74	0.00532574	0.0461486	8.68e-05	0.000132687	1.52947	up
g__Bacteroides;s__Bacteroides sp. An269	Outside	2.96e-05	1.03e-05	74	74	0.0052754	0.0461486	6.86e-05	9.82e-05	1.43157	up
g__Butyrivibrio;s__Butyrivibrio sp. FC2001	Outside	6.17e-06	2.13e-06	74	74	0.00532398	0.0461486	8.43e-06	1.46e-05	1.73045	up
g__Clostridium;s__Clostridium cellulovorans	Outside	-1.3e-05	4.51e-06	74	74	0.00534747	0.0461486	6.39e-05	5.25e-05	0.82135	down
g__Olivibacter;s__Olivibacter sitiensis	Outside	5.93e-06	1.87e-06	74	71	0.00534559	0.0461486	6.92e-06	1.28e-05	1.8552	up
g__Peptoanaerobacter;s__[Eubacterium] yurii	Outside	8.79e-06	3.15e-06	74	74	0.00528074	0.0461486	6.98e-06	1.58e-05	2.25681	up
g__Unclassified;s__Clostridiales bacterium 52_15	Outside	-8.97e-05	3.12e-05	74	74	0.00534421	0.0461486	0.000363162	0.000273851	0.754073	down
g__Prevotella;s__Prevotella multisaccharivorax	Outside	-0.00011809	4.1e-05	74	74	0.00541141	0.0465913	0.000309411	0.000191601	0.619242	down
g__Unclassified;s__Lachnospiraceae bacterium C10	Outside	8.05e-06	2.89e-06	74	74	0.00542479	0.0465975	1.01e-05	1.81e-05	1.79837	up
g__Clostridium;s__Clostridium sporogenes	Outside	8.97e-06	3.24e-06	74	74	0.00558233	0.0477122	1.67e-05	2.56e-05	1.53756	up
g__Coprobacillus;s__Coprobacillus sp. 8_2_54BFAA	Outside	-5.95e-06	2.01e-06	74	74	0.00560309	0.0477122	1.75e-05	1.16e-05	0.662039	down
g__Coprococcus;s__uncultured Coprococcus sp.	Outside	-1.03e-05	3.64e-06	74	74	0.00560339	0.0477122	3.07e-05	2.07e-05	0.673851	down
g__Unclassified;s__Elusimicrobia bacterium CG08_land_8_20_14_0_20_51_18	Outside	-3.78e-06	8.52e-07	74	74	0.00560635	0.0477122	5.12e-06	1.35e-06	0.263504	down
g__Coprobacillus;s__Coprobacillus sp. CAG:605	Outside	0.000145449	5.1e-05	74	74	0.00565806	0.0479309	0.000122567	0.000267732	2.18437	up
g__Unclassified;s__uncultured bacterium	Outside	0.000178745	6.27e-05	74	74	0.00564951	0.0479309	0.00156335	0.00174279	1.11478	up
g__Unclassified;s__Candidatus Saccharibacteria bacterium 32-49-10	Outside	3.38e-06	7.21e-07	74	70	0.00569305	0.0481167	1.32e-06	4.69e-06	3.56124	up
g__Lachnoanaerobaculum;s__Lachnoanaerobaculum sp. OBRC5-5	Outside	-5.82e-06	1.44e-06	74	74	0.00571418	0.0481848	1.03e-05	4.5e-06	0.436561	down
g__Runella;s__Runella limosa	Outside	3.33e-06	6.13e-07	74	74	0.00576277	0.0484836	2.08e-06	5.47e-06	2.62602	up
g__Bifidobacterium;s__Bifidobacterium hapali	Outside	5.78e-06	1.43e-06	74	74	0.00578884	0.048592	2.96e-06	8.72e-06	2.94825	up
g__Trichococcus;s__Trichococcus flocculiformis	Outside	3.59e-06	8.1e-07	74	74	0.00581598	0.0487089	2.55e-06	6.13e-06	2.40604	up
g__Bacteroides;s__Bacteroides sp. Marseille-P3208T	Outside	5.19e-05	1.83e-05	74	74	0.00587609	0.0489895	0.000148994	0.000200882	1.34825	up
g__Porphyromonas;s__Porphyromonas levii	Outside	6.93e-06	2.5e-06	74	74	0.00587202	0.0489895	7.97e-06	1.49e-05	1.86746	up
g__Mucilaginibacter;s__Mucilaginibacter pedocola	Outside	3.33e-06	5.79e-07	74	67	0.0059552	0.049537	1.39e-06	4.69e-06	3.37562	up
g__Ohtaekwangia;s__Ohtaekwangia koreensis	Outside	7.62e-06	2.77e-06	74	74	0.006002	0.0498139	8.61e-06	1.62e-05	1.88432	up
g__Cohnella;s__Cohnella panacarvi	Outside	-6.16e-06	2.15e-06	74	74	0.00602189	0.0498667	1.24e-05	6.4e-06	0.517731	down
