# Supplementary material for: Dynamics of the gut microbiota in rats after hypobaric hypoxia exposure
Source: PeerJ. 2022 Oct 7;10:e14090. doi: 10.7717/peerj.14090 (PMC9549897; doi:10.7717/peerj.14090)
Supplement: Table S2 [file peerj-10-14090-s005.xlsx]

## Sheet: diff_module
module	value	coef	stderr	N	N.not.0	pval	qval	module description	mean_inside	mean_outside	ratio (outside/inside)	change
M00097	Outside	-2.33e-05	2.9e-06	74	74	9.63e-16	5.1e-13	beta-Carotene biosynthesis, GGAP => beta-carotene	5.95e-06	1.33e-06	0.224167	down
M00015	Outside	-0.000480816	7.2e-05	74	74	4.32e-09	1.14e-06	Proline biosynthesis, glutamate => proline	0.000675581	0.000592457	0.876958	down
M00240	Outside	-0.000797175	0.000128596	74	74	3.19e-08	5.63e-06	Iron complex transport system	0.000949991	0.000805421	0.84782	down
M00695	Outside	8.74e-05	1.46e-05	74	74	1.06e-07	1.12e-05	cAMP signaling	2.01e-05	3.84e-05	1.90769	up
M00166	Outside	0.000246945	4.16e-05	74	74	9.17e-08	1.12e-05	Reductive pentose phosphate cycle, ribulose-5P => glyceraldehyde-3P	0.000537151	0.000598261	1.11377	up
M00141	Outside	0.000139354	2.49e-05	74	74	3.73e-07	2.77e-05	C1-unit interconversion, eukaryotes	0.000247984	0.000281905	1.13679	up
M00026	Outside	-0.00145671	0.0002602	74	74	3.7e-07	2.77e-05	Histidine biosynthesis, PRPP => histidine	0.00175351	0.00149385	0.851921	down
M00335	Outside	0.00085931	0.00015336	74	74	4.17e-07	2.77e-05	Sec (secretion) system	0.00239267	0.00262269	1.09614	up
M00016	Outside	-0.000581143	0.000107955	74	74	1.05e-06	6.2e-05	Lysine biosynthesis, succinyl-DAP pathway, aspartate => lysine	0.00204947	0.00197481	0.963572	down
M00573	Outside	0.00072988	0.000138823	74	74	1.43e-06	6.32e-05	Biotin biosynthesis, BioI pathway, long-chain-acyl-ACP => pimeloyl-ACP => biotin	0.000445459	0.000600975	1.34912	up
M00577	Outside	0.00072988	0.000138823	74	74	1.43e-06	6.32e-05	Biotin biosynthesis, BioW pathway, pimelate => pimeloyl-CoA => biotin	0.000445459	0.000600975	1.34912	up
M00123	Outside	0.00072988	0.000138823	74	74	1.43e-06	6.32e-05	Biotin biosynthesis, pimeloyl-ACP/CoA => biotin	0.000445459	0.000600975	1.34912	up
M00552	Outside	0.00021522	4.26e-05	74	74	3.21e-06	0.000131002	D-galactonate degradation, De Ley-Doudoroff pathway, D-galactonate => glycerate-3P	0.000554143	0.000608799	1.09863	up
M00535	Outside	-0.000560946	0.000116024	74	74	7.33e-06	0.000277392	Isoleucine biosynthesis, pyruvate => 2-oxobutanoate	0.000673992	0.000575659	0.854104	down
M00157	Outside	0.000578386	0.000127193	74	74	2.33e-05	0.000772536	F-type ATPase, prokaryotes and chloroplasts	0.00191808	0.00207844	1.0836	up
M00052	Outside	0.000286677	6.32e-05	74	74	2.24e-05	0.000772536	Pyrimidine ribonucleotide biosynthesis, UMP => UDP/UTP,CDP/CTP	0.000655393	0.000728143	1.111	up
M00359	Outside	0.00200024	0.000447309	74	74	2.83e-05	0.000802994	Aminoacyl-tRNA biosynthesis, eukaryotes	0.0066051	0.0071677	1.08518	up
M00360	Outside	0.00202187	0.000450799	74	74	3.03e-05	0.000802994	Aminoacyl-tRNA biosynthesis, prokaryotes	0.00670906	0.00727951	1.08503	up
M00499	Outside	-0.00029875	6.63e-05	74	74	2.73e-05	0.000802994	HydH-HydG (metal tolerance) two-component regulatory system	0.000183108	0.000125432	0.685014	down
M00375	Outside	0.000142123	3.18e-05	74	74	2.93e-05	0.000802994	Hydroxypropionate-hydroxybutylate cycle	0.000185454	0.000217385	1.17218	up
M00596	Outside	-0.000128191	2.89e-05	74	74	3.4e-05	0.000857333	Dissimilatory sulfate reduction, sulfate => H2S	5.77e-05	3.29e-05	0.569515	down
M00176	Outside	-0.000299398	6.95e-05	74	74	5.1e-05	0.00122916	Assimilatory sulfate reduction, sulfate => H2S	0.00015756	9.91e-05	0.628862	down
M00579	Outside	0.000234077	5.46e-05	74	74	5.58e-05	0.0012854	Phosphate acetyltransferase-acetate kinase pathway, acetyl-CoA => acetate	0.000564287	0.000624154	1.10609	up
M00338	Outside	-9.11e-06	2.05e-06	74	72	6.75e-05	0.0013767	Cysteine biosynthesis, homocysteine + serine => cysteine	2.66e-06	8.41e-07	0.316092	down
M00008	Outside	-0.000182629	4.3e-05	74	74	6.38e-05	0.0013767	Entner-Doudoroff pathway, glucose-6P => glyceraldehyde-3P + pyruvate	0.00030225	0.00027092	0.896346	down
M00432	Outside	-0.00050308	0.00011888	74	74	6.73e-05	0.0013767	Leucine biosynthesis, 2-oxoisovalerate => 2-oxoisocaproate	0.000795356	0.0007106	0.893436	down
M00017	Outside	-0.000266934	6.35e-05	74	74	7.43e-05	0.00145919	Methionine biosynthesis, apartate => homoserine => methionine	0.00127722	0.00124941	0.978231	down
M00189	Outside	-0.0001732	4.14e-05	74	74	8.27e-05	0.00156471	Molybdate transport system	0.000179899	0.00014625	0.812952	down
M00020	Outside	0.000221388	5.34e-05	74	74	9.16e-05	0.00167428	Serine biosynthesis, glycerate-3P => serine	0.000598348	0.000655099	1.09485	up
M00567	Outside	-0.000130874	3.19e-05	74	74	0.00010424	0.00184157	Methanogenesis, CO2 => methane	8.49e-05	6e-05	0.706713	down
M00572	Outside	-0.000363473	9.08e-05	74	74	0.000151184	0.00258476	Pimeloyl-ACP biosynthesis, BioC-BioH pathway, malonyl-ACP => pimeloyl-ACP	0.00102518	0.0009731	0.949197	down
M00208	Outside	-0.000220129	5.52e-05	74	74	0.00016663	0.00275981	Glycine betaine/proline transport system	6.6e-05	2.24e-05	0.338673	down
M00434	Outside	-0.000261372	6.68e-05	74	74	0.000205316	0.00329749	PhoR-PhoB (phosphate starvation response) two-component regulatory system	0.000486916	0.000444793	0.91349	down
M00178	Outside	0.00421559	0.00108292	74	74	0.000219185	0.00341671	Ribosome, bacteria	0.0131447	0.0143502	1.09171	up
M00526	Outside	-0.000415088	0.000107563	74	74	0.000262271	0.00397153	Lysine biosynthesis, DAP dehydrogenase pathway, aspartate => lysine	0.00163679	0.0015882	0.970317	down
M00394	Outside	0.00013067	3.42e-05	74	74	0.000277762	0.00408928	RNA degradosome	0.000599203	0.000638619	1.06578	up
M00081	Outside	-0.000147507	3.87e-05	74	74	0.000307008	0.00434343	Pectin degradation	0.000140776	0.000114158	0.810917	down
M00179	Outside	0.00254282	0.000671142	74	74	0.000311416	0.00434343	Ribosome, archaea	0.00830412	0.00902617	1.08695	up
M00021	Outside	-0.000453794	0.000121182	74	74	0.000381357	0.00518254	Cysteine biosynthesis, serine => cysteine	0.000710027	0.000633781	0.892615	down
M00023	Outside	-0.00107768	0.000292071	74	74	0.000432894	0.00573584	Tryptophan biosynthesis, chorismate => tryptophan	0.00122233	0.00103314	0.845216	down
M00122	Outside	-0.00053807	0.000148371	74	74	0.000532917	0.00688893	Cobalamin biosynthesis, cobinamide => cobalamin	0.000826417	0.000733921	0.888076	down
M00281	Outside	-2.22e-05	6.15e-06	74	74	0.000552599	0.00697327	PTS system, lactose-specific II component	7.67e-06	3.3e-06	0.430267	down
M00452	Outside	-4.3e-05	1.2e-05	74	70	0.000641772	0.00755864	CusS-CusR (copper tolerance) two-component regulatory system	9.38e-06	6.4e-07	0.0681779	down
M00745	Outside	-4.3e-05	1.2e-05	74	70	0.000641772	0.00755864	Imipenem resistance, repression of porin OprD	9.38e-06	6.4e-07	0.0681779	down
M00740	Outside	-0.000305902	8.51e-05	74	74	0.000625849	0.00755864	Methylaspartate cycle	0.000680986	0.000632074	0.928175	down
M00332	Outside	-0.000152379	4.32e-05	74	74	0.000760228	0.00875915	Type III secretion system	3.21e-05	1.28e-06	0.0398093	down
M00356	Outside	-0.000103601	2.95e-05	74	74	0.000785737	0.00886044	Methanogenesis, methanol => methane	7.77e-05	5.82e-05	0.749016	down
M00010	Outside	-0.000441005	0.000128575	74	74	0.00100284	0.0107712	Citrate cycle, first carbon oxidation, oxaloacetate => 2-oxoglutarate	0.000499392	0.000418576	0.838171	down
M00373	Outside	0.000317559	9.27e-05	74	74	0.00101615	0.0107712	Ethylmalonyl pathway	0.000395683	0.000467781	1.18221	up
M00005	Outside	0.000146628	4.26e-05	74	74	0.00100101	0.0107712	PRPP biosynthesis, ribose 5P => PRPP	0.000316279	0.000353647	1.11815	up
M00721	Outside	-0.000225782	6.77e-05	74	74	0.00135564	0.0140572	Cationic antimicrobial peptide (CAMP) resistance, arnBCADTEF operon	9.71e-05	5.19e-05	0.534851	down
M00542	Outside	-0.000120082	3.61e-05	74	74	0.00145725	0.0140572	EHEC/EPEC pathogenicity signature, T3SS and effectors	2.53e-05	8.94e-07	0.035379	down
M00346	Outside	0.000278042	8.4e-05	74	74	0.00145877	0.0140572	Formaldehyde assimilation, serine pathway	0.000892876	0.000968986	1.08524	up
M00029	Outside	-0.000225687	6.8e-05	74	74	0.00142129	0.0140572	Urea cycle	0.00058562	0.000551363	0.941503	down
M00660	Outside	-0.000110282	3.31e-05	74	74	0.00140931	0.0140572	Xanthomonas spp. pathogenicity signature, T3SS and effectors	2.32e-05	8.31e-07	0.0357967	down
M00527	Outside	-0.000510533	0.000157109	74	74	0.00175842	0.0166422	Lysine biosynthesis, DAP aminotransferase pathway, aspartate => lysine	0.00206729	0.00200936	0.971978	down
M00453	Outside	-4.67e-05	1.46e-05	74	74	0.00198506	0.0184576	QseC-QseB (quorum sensing) two-component regulatory system	1.06e-05	1.05e-06	0.0990642	down
M00002	Outside	0.000407875	0.000128403	74	74	0.00219543	0.0200617	Glycolysis, core module involving three-carbon compounds	0.00187101	0.00199509	1.06632	up
M00512	Outside	-5.43e-06	1.08e-06	74	51	0.00227388	0.020086	CckA-CtrA/CpdR (cell cycle control) two-component regulatory system	1.17e-06	8.74e-08	0.0748709	down
M00183	Outside	0.000355555	0.000111719	74	74	0.00223902	0.020086	RNA polymerase, bacteria	0.00124062	0.00134002	1.08013	up
M00366	Outside	8e-05	2.53e-05	74	74	0.00242214	0.0210449	C10-C20 isoprenoid biosynthesis, plants	0.000274962	0.00029744	1.08175	up
M00115	Outside	0.000293625	9.38e-05	74	74	0.00251261	0.0214788	NAD biosynthesis, aspartate => NAD	0.00107743	0.00116136	1.07789	up
M00840	Outside	0.000341372	0.000110334	74	74	0.00281119	0.0236497	Tetrahydrofolate biosynthesis, mediated by ribA and trpF, GTP => THF	0.000536852	0.000618586	1.15225	up
M00259	Outside	-7.42e-05	2.4e-05	74	74	0.00287929	0.0238441	Heme transport system	1.92e-05	4.09e-06	0.213049	down
M00358	Outside	2.39e-05	7.81e-06	74	74	0.00307836	0.0251005	Coenzyme M biosynthesis	5.3e-06	1.01e-05	1.9095	up
M00012	Outside	-0.000203102	6.7e-05	74	74	0.00347811	0.0269188	Glyoxylate cycle	0.00055776	0.000527321	0.945427	down
M00035	Outside	-0.000603747	0.000199717	74	74	0.00346557	0.0269188	Methionine degradation	0.00129085	0.00119608	0.926584	down
M00222	Outside	-0.000381052	0.000126123	74	74	0.00348342	0.0269188	Phosphate transport system	0.000735567	0.000672986	0.914921	down
M00741	Outside	0.000334563	0.000110812	74	74	0.00350452	0.0269188	Propanoyl-CoA metabolism, propanoyl-CoA => succinyl-CoA	0.000316245	0.000390623	1.23519	up
M00298	Outside	9.95e-05	3.3e-05	74	74	0.00362539	0.0270627	Multidrug/hemolysin transport system	6.08e-05	8.35e-05	1.37332	up
M00442	Outside	-1.36e-05	4.52e-06	74	74	0.00362162	0.0270627	Putative hydroxymethylpyrimidine transport system	8.29e-06	5.76e-06	0.694576	down
M00445	Outside	-4.79e-05	1.62e-05	74	74	0.00418235	0.0299547	EnvZ-OmpR (osmotic stress response) two-component regulatory system	1.1e-05	1.17e-06	0.106578	down
M00466	Outside	-8.03e-06	2.8e-06	74	73	0.00413257	0.0299547	NblS-NblR (photosynthesis) two-component regulatory system	3.55e-06	2.08e-06	0.58564	down
M00038	Outside	2.37e-05	7.99e-06	74	74	0.00411983	0.0299547	Tryptophan metabolism, tryptophan => kynurenine => 2-aminomuconate	9.3e-06	1.42e-05	1.52893	up
M00436	Outside	-6.94e-05	2.36e-05	74	74	0.00444009	0.0309638	Sulfonate transport system	3.23e-05	1.83e-05	0.567291	down
M00040	Outside	-2.87e-05	9.76e-06	74	74	0.00438211	0.0309638	Tyrosine biosynthesis, prephanate => pretyrosine => tyrosine	1.15e-05	5.74e-06	0.497145	down
M00701	Outside	-0.000135593	4.64e-05	74	74	0.004694	0.0323094	Multidrug resistance, efflux pump EmrAB	0.000105332	7.86e-05	0.74665	down
M00083	Outside	-0.000256277	8.91e-05	74	74	0.00529752	0.035996	Fatty acid biosynthesis, elongation	0.00150105	0.00148182	0.987193	down
M00525	Outside	-0.000287446	0.0001	74	74	0.00543196	0.0360458	Lysine biosynthesis, acetyl-DAP pathway, aspartate => lysine	0.00169072	0.00166917	0.987256	down
M00563	Outside	-0.000101252	3.53e-05	74	74	0.00544087	0.0360458	Methanogenesis, methylamine/dimethylamine/trimethylamine => methane	8.49e-05	6.58e-05	0.775059	down
M00500	Outside	-4.45e-05	1.56e-05	74	74	0.00578374	0.0378442	AtoS-AtoC (cPHB biosynthesis) two-component regulatory system	1.16e-05	2.57e-06	0.220593	down
M00702	Outside	-5.86e-06	1.48e-06	74	70	0.00606181	0.03918	Multidrug resistance, efflux pump NorB	1.73e-06	5.77e-07	0.333938	down
M00364	Outside	6.07e-05	2.17e-05	74	74	0.00663998	0.0418951	C10-C20 isoprenoid biosynthesis, bacteria	0.000282456	0.000301007	1.06568	up
M00331	Outside	-0.000320958	0.000114708	74	74	0.00659199	0.0418951	Type II general secretion pathway	0.000142754	7.79e-05	0.545881	down
M00835	Outside	-5.79e-06	1.56e-06	74	70	0.00702049	0.0437748	Pyocyanine biosynthesis, chorismate => pyocyanine	1.49e-06	3.46e-07	0.23173	down
M00227	Outside	-5.23e-05	1.88e-05	74	74	0.00722806	0.044545	Glutamine transport system	1.25e-05	1.78e-06	0.142023	down
M00471	Outside	-3.55e-05	1.29e-05	74	74	0.00735841	0.0448271	NarX-NarL (nitrate respiration) two-component regulatory system	8.44e-06	1.15e-06	0.136493	down
M00546	Outside	-0.000162087	5.9e-05	74	74	0.00762544	0.045926	Purine degradation, xanthine => urea	6.41e-05	3.12e-05	0.486433	down
M00242	Outside	0.000198998	7.28e-05	74	74	0.00796536	0.0474341	Zinc transport system	0.000392747	0.000440867	1.12252	up
M00555	Outside	-3.59e-05	1.32e-05	74	74	0.00809091	0.0476465	Betaine biosynthesis, choline => betaine	8.75e-06	1.4e-06	0.16021	down
M00767	Outside	-2.37e-05	8.71e-06	74	69	0.00830779	0.048386	Multidrug resistance, efflux pump OqxAB	5.34e-06	4.53e-07	0.0848012	down
M00440	Outside	-0.000115034	4.25e-05	74	74	0.00844296	0.0486388	Nickel transport system	3.27e-05	9.08e-06	0.277745	down
M00217	Outside	-2.41e-05	8.95e-06	74	73	0.00872195	0.0486593	D-Allose transport system	6.25e-06	1.27e-06	0.20268	down
M00530	Outside	-0.00025269	9.37e-05	74	74	0.00870487	0.0486593	Dissimilatory nitrate reduction, nitrate => ammonia	8.25e-05	3.09e-05	0.374372	down
M00349	Outside	-6.96e-05	2.58e-05	74	74	0.00870714	0.0486593	Microcin C transport system	1.84e-05	4.01e-06	0.217933	down
M00273	Outside	-0.000113118	4.2e-05	74	74	0.00885933	0.0489109	PTS system, fructose-specific II component	7.83e-05	5.6e-05	0.715301	down
