# Supplementary material for: Dynamics of the gut microbiota in rats after hypobaric hypoxia exposure
Source: PeerJ. 2022 Oct 7;10:e14090. doi: 10.7717/peerj.14090 (PMC9549897; doi:10.7717/peerj.14090)
Supplement: Table S3 [file peerj-10-14090-s006.xlsx]

## Sheet: species_module_r(r>0.7,q<0.05)
module	species	q value	r
M00141	g__Unclassified;s__Bacteroidales bacterium 52_46	1.34771e-18	0.844384
M00052	g__Unclassified;s__Bacteroidales bacterium 52_46	2.61698e-18	0.837867
M00141	g__Prevotella;s__Prevotella sp. CAG:873	7.81584e-18	0.830315
M00141	g__Parabacteroides;s__Parabacteroides sp. YL27	8.78401e-18	0.828212
M00141	g__Prevotella;s__Prevotella sp. CAG:1031	1.23767e-17	0.82522
M00141	g__Fibrobacter;s__Fibrobacter sp. UWT2	6.23331e-17	0.814445
M00052	g__Prevotella;s__Prevotella sp. CAG:1031	9.36457e-17	0.810944
M00141	g__Bacteroides;s__Bacteroides sp. CAG:927	9.36457e-17	0.810648
M00141	g__Dysgonomonas;s__Dysgonomonas sp. BGC7	1.51724e-16	0.806241
M00123	g__Prevotella;s__Prevotella sp. CAG:1031	1.51724e-16	0.805168
M00573	g__Prevotella;s__Prevotella sp. CAG:1031	1.51724e-16	0.805168
M00577	g__Prevotella;s__Prevotella sp. CAG:1031	1.51724e-16	0.805168
M00052	g__Parabacteroides;s__Parabacteroides sp. YL27	3.36992e-16	0.799867
M00141	g__Bacteroides;s__Bacteroides ihuae	6.40433e-16	0.794683
M00123	g__Parabacteroides;s__Parabacteroides sp. YL27	6.40433e-16	0.794328
M00573	g__Parabacteroides;s__Parabacteroides sp. YL27	6.40433e-16	0.794328
M00577	g__Parabacteroides;s__Parabacteroides sp. YL27	6.40433e-16	0.794328
M00141	g__Parapedobacter;s__Parapedobacter koreensis	8.40384e-16	0.792248
M00141	g__Streptomyces;s__Streptomyces sp. AA4	1.04118e-15	0.790536
M00052	g__Prevotella;s__Prevotella sp. CAG:873	1.5355e-15	0.787279
M00052	g__Dysgonomonas;s__Dysgonomonas sp. BGC7	1.5355e-15	0.787092
M00141	g__Spongiibacterium;s__Spongiibacterium pacificum	1.62492e-15	0.786442
M00335	g__Unclassified;s__Bacteroidales bacterium 52_46	1.79584e-15	0.785324
M00335	g__Dysgonomonas;s__Dysgonomonas sp. BGC7	1.79584e-15	0.785256
M00052	g__Salinivirga;s__Salinivirga cyanobacteriivorans	4.63644e-15	0.778514
M00335	g__Prevotella;s__Prevotella sp. CAG:873	5.23132e-15	0.776853
M00123	g__Bacteroides;s__Bacteroides sp. CAG:927	5.23132e-15	0.776735
M00573	g__Bacteroides;s__Bacteroides sp. CAG:927	5.23132e-15	0.776735
M00577	g__Bacteroides;s__Bacteroides sp. CAG:927	5.23132e-15	0.776735
M00123	g__Prevotella;s__Prevotella sp. CAG:873	5.56376e-15	0.775668
M00573	g__Prevotella;s__Prevotella sp. CAG:873	5.56376e-15	0.775668
M00577	g__Prevotella;s__Prevotella sp. CAG:873	5.56376e-15	0.775668
M00141	g__Unclassified;s__Bacteroidia bacterium 43-41	6.68671e-15	0.774163
M00141	g__Salinivirga;s__Salinivirga cyanobacteriivorans	7.66686e-15	0.77299
M00141	g__Bacteroides;s__Bacteroides propionicifaciens	8.74152e-15	0.771856
M00335	g__Salinivirga;s__Salinivirga cyanobacteriivorans	1.05457e-14	0.77031
M00141	g__Prevotella;s__Prevotella loescheii	1.1682e-14	0.76938
M00335	g__Bacteroides;s__Bacteroides sp. CAG:927	1.32763e-14	0.768145
M00157	g__Unclassified;s__Bacteroidales bacterium 52_46	1.32763e-14	0.768086
M00123	g__Unclassified;s__Bacteroidales bacterium 52_46	1.40367e-14	0.767168
M00573	g__Unclassified;s__Bacteroidales bacterium 52_46	1.40367e-14	0.767168
M00577	g__Unclassified;s__Bacteroidales bacterium 52_46	1.40367e-14	0.767168
M00335	g__Prevotella;s__Prevotella sp. CAG:1031	1.58598e-14	0.766101
M00141	g__Dysgonomonas;s__Dysgonomonas gadei	2.19369e-14	0.76336
M00123	g__Dysgonomonas;s__Dysgonomonas gadei	3.78311e-14	0.758754
M00573	g__Dysgonomonas;s__Dysgonomonas gadei	3.78311e-14	0.758754
M00577	g__Dysgonomonas;s__Dysgonomonas gadei	3.78311e-14	0.758754
M00335	g__Parabacteroides;s__Parabacteroides sp. YL27	4.61606e-14	0.757068
M00052	g__Bacteroides;s__Bacteroides sp. CAG:927	1.06698e-13	0.750019
M00157	g__Parabacteroides;s__Parabacteroides sp. YL27	1.11094e-13	0.749278
M00123	g__Bacteroides;s__Bacteroides ihuae	1.11094e-13	0.74913
M00573	g__Bacteroides;s__Bacteroides ihuae	1.11094e-13	0.74913
M00577	g__Bacteroides;s__Bacteroides ihuae	1.11094e-13	0.74913
M00123	g__Dysgonomonas;s__Dysgonomonas sp. BGC7	1.31911e-13	0.74721
M00573	g__Dysgonomonas;s__Dysgonomonas sp. BGC7	1.31911e-13	0.74721
M00577	g__Dysgonomonas;s__Dysgonomonas sp. BGC7	1.31911e-13	0.74721
M00052	g__Parapedobacter;s__Parapedobacter koreensis	1.46715e-13	0.746216
M00695	g__Parapedobacter;s__Parapedobacter koreensis	1.50552e-13	0.745862
M00052	g__Bacteroides;s__Bacteroides ihuae	1.50552e-13	0.745753
M00335	g__Fibrobacter;s__Fibrobacter sp. UWT2	1.66905e-13	0.744663
M00123	g__Streptomyces;s__Streptomyces sp. AA4	1.88404e-13	0.743308
M00573	g__Streptomyces;s__Streptomyces sp. AA4	1.88404e-13	0.743308
M00577	g__Streptomyces;s__Streptomyces sp. AA4	1.88404e-13	0.743308
M00335	g__Parapedobacter;s__Parapedobacter koreensis	2.65061e-13	0.740232
M00141	g__Porphyromonas;s__Porphyromonas endodontalis	3.2488e-13	0.738315
M00157	g__Prevotella;s__Prevotella sp. CAG:1031	3.8434e-13	0.736749
M00157	g__Porphyromonas;s__Porphyromonas endodontalis	5.78891e-13	0.733117
M00123	g__Porphyromonas;s__Porphyromonas endodontalis	6.00638e-13	0.732465
M00573	g__Porphyromonas;s__Porphyromonas endodontalis	6.00638e-13	0.732465
M00577	g__Porphyromonas;s__Porphyromonas endodontalis	6.00638e-13	0.732465
M00695	g__Bacteroides;s__Bacteroides sp. CAG:927	1.00613e-12	0.727827
M00499	g__Bacteroides;s__Bacteroides sp. An19	1.07227e-12	0.727153
M00157	g__Prevotella;s__Prevotella sp. CAG:873	1.20984e-12	0.725968
M00335	g__Streptomyces;s__Streptomyces sp. AA4	2.02702e-12	0.721197
M00335	g__Unclassified;s__Bacteroidia bacterium 43-41	2.81171e-12	0.71808
M00335	g__Prevotella;s__Prevotella loescheii	3.18506e-12	0.716495
M00335	g__Bacteroides;s__Bacteroides ihuae	3.73739e-12	0.714713
M00123	g__Prevotella;s__Prevotella loescheii	5.33305e-12	0.710823
M00573	g__Prevotella;s__Prevotella loescheii	5.33305e-12	0.710823
M00577	g__Prevotella;s__Prevotella loescheii	5.33305e-12	0.710823
M00157	g__Bacteroides;s__Bacteroides sp. CAG:927	6.09894e-12	0.709441
M00141	g__Millionella;s__Millionella massiliensis	6.85277e-12	0.708125
M00695	g__Parabacteroides;s__Parabacteroides sp. YL27	7.03543e-12	0.707775
M00335	g__Spongiibacterium;s__Spongiibacterium pacificum	8.30497e-12	0.705975
M00157	g__Parapedobacter;s__Parapedobacter koreensis	1.11363e-11	0.702953
M00123	g__Parapedobacter;s__Parapedobacter koreensis	1.11363e-11	0.702583
M00573	g__Parapedobacter;s__Parapedobacter koreensis	1.11363e-11	0.702583
M00577	g__Parapedobacter;s__Parapedobacter koreensis	1.11363e-11	0.702583
M00123	g__Salinivirga;s__Salinivirga cyanobacteriivorans	1.11363e-11	0.702452
M00573	g__Salinivirga;s__Salinivirga cyanobacteriivorans	1.11363e-11	0.702452
M00577	g__Salinivirga;s__Salinivirga cyanobacteriivorans	1.11363e-11	0.702452
M00695	g__Prevotella;s__Prevotella sp. CAG:1031	1.40018e-11	0.700088
M00026	g__Prevotella;s__Prevotella loescheii	8.20454e-12	-0.706188
M00026	g__Bacteroides;s__Bacteroides ihuae	6.74497e-12	-0.708375
M00026	g__Streptomyces;s__Streptomyces sp. AA4	5.2167e-12	-0.711333
M00097	g__Prevotella;s__Prevotella loescheii	4.87554e-12	-0.712078
M00026	g__Bacteroides;s__Bacteroides propionicifaciens	3.73739e-12	-0.71469
M00026	g__Unclassified;s__Bacteroidales bacterium 52_46	3.60036e-12	-0.715246
M00026	g__Prevotella;s__Prevotella sp. CAG:1031	3.18506e-12	-0.716549
M00015	g__Parapedobacter;s__Parapedobacter koreensis	3.18506e-12	-0.716639
M00026	g__Prevotella;s__Prevotella sp. CAG:873	2.88479e-12	-0.717734
M00015	g__Parabacteroides;s__Parabacteroides sp. YL27	3.2488e-13	-0.73829
M00015	g__Unclassified;s__Bacteroidales bacterium 52_46	2.50037e-13	-0.740837
M00015	g__Prevotella;s__Prevotella loescheii	1.53945e-13	-0.745448
M00026	g__Spongiibacterium;s__Spongiibacterium pacificum	1.21461e-13	-0.748275
M00015	g__Prevotella;s__Prevotella sp. CAG:873	6.37405e-14	-0.754254
M00015	g__Unclassified;s__Bacteroidia bacterium 43-41	5.60036e-14	-0.755415
M00015	g__Prevotella;s__Prevotella sp. CAG:1031	1.924e-14	-0.764502
M00015	g__Salinivirga;s__Salinivirga cyanobacteriivorans	1.19814e-15	-0.78931
M00015	g__Bacteroides;s__Bacteroides sp. CAG:927	1.51724e-16	-0.805702
M00015	g__Dysgonomonas;s__Dysgonomonas sp. BGC7	2.01794e-17	-0.821598
